# Supplementary material for: Chromatographic Data in Statistical Analysis of BBB Permeability Indices
Source: MDPI journal article supplement (doi:10.3390/membranes13070623), 2023-06-26
Supplement: s1 [file s1]

Table S1a. Dataset of 181 APIs

|    | API                  | CNS+/- | Ku,pp,brain | B1      | B2 code | B2      | B2>-0.9 | B2>-0.52 | PhCharg | pKa   | logU/D | PB    | NP/logD | NP/Sa | NP/MW | NP/V | NP   | NP/PSA |
|----|----------------------|--------|-------------|---------|---------|---------|---------|----------|---------|-------|--------|-------|---------|-------|-------|------|------|--------|
| 1  | acebutolol           | 0      |             | 0.0888  | 2       | -0.8556 | 1       | 0        | 1       | 9.4   | -2.2   | 0.26  | 1.73    | 0.07  | 0.13  | 0.14 | 0.45 | 0.52   |
| 2  | aceclofenac          |        |             | -0.4422 | 2       | -0.6631 | 1       | 0        | -1      | 2.6   | -4.6   | 0.99  | 2.02    | 0.20  | 0.25  | 0.31 | 0.89 | 1.19   |
| 3  | acenocumarol         | 1      |             | -1.0731 | 1       | -1.2037 | 0       | 0        | -1      | 4.5   | -2.7   | 0.987 | 2.91    | 0.21  | 0.28  | 0.33 | 0.99 | 0.90   |
| 4  | acetazolamid         | 1      |             |         | 1       | -1.2936 | 0       | 0        | -1      | 7.44  | -0.24  | 0.98  | -1.71   | 0.20  | 0.34  | 0.32 | 0.94 | 0.82   |
| 5  | acetylsalicylic acid | 1      |             | -4.7543 | 3       | -0.4706 | 1       | 1        | -1      | 3.48  | -3.72  | 0.995 | -0.47   | 0.29  | 0.49  | 0.58 | 0.89 | 1.41   |
| 6  | aciclovir            |        |             | -1.7069 | 1       | -1.2103 | 0       | 0        | 0       | 5.11  | -2.09  | 0.21  | -0.41   | 0.20  | 0.32  | 0.39 | 0.73 | 0.66   |
| 7  | allopurinol          | 1      |             | -0.0024 | 3       | -0.5066 | 1       | 1        | 0       | 9.2   | -2     |       | -0.94   | 0.43  | 0.65  | 0.82 | 0.89 | 1.34   |
| 8  | alprazolam           | 1      |             | 0.2859  | 3       | -0.0632 | 1       | 1        | 0       | 2.37  | -4.83  | 0.8   | 0.34    | 0.29  | 0.28  | 0.32 | 0.85 | 2.25   |
| 9  | amiodarone           | 1      |             | 0.5965  | 3       | -0.1359 | 1       | 1        | 1       | 9.37  | -2.17  | 0.96  | 0.08    | 0.11  | 0.09  | 0.12 | 0.55 | 1.41   |
| 10 | amitriptyline        | 1      | 1.33        |         | 3       | 0.4952  | 1       | 1        | 1       | 9.18  | -1.98  | 0.95  | 0.10    | 0.09  | 0.14  | 0.21 | 0.32 | 9.57   |
| 11 | amlodipine           | 0      |             | -0.0905 | 1       | -1.0511 | 0       | 0        | 1       | 8.97  | -1.77  | 0.975 | 0.22    | 0.09  | 0.14  | 0.15 | 0.56 | 0.56   |
| 12 | amoxilicillin        | 0      |             | -2.2260 | 1       | -1.9852 | 0       | 0        | 0       | 2.44  | -4.76  | 0.2   | -0.28   | 0.14  | 0.19  | 0.22 | 0.68 | 0.43   |
| 13 | astemizol            | 1      |             | -0.3065 | 3       | -0.0512 | 1       | 1        | 1       | 8.68  | -1.48  | 0.967 | 0.15    | 0.10  | 0.14  | 0.15 | 0.62 | 1.63   |
| 14 | atenolol             | 0      |             | -0.9866 | 2       | -0.8063 | 1       | 0        | 1       | 9.43  | -2.23  |       | -0.20   | 0.12  | 0.13  | 0.15 | 0.34 | 0.39   |
| 15 | atorvastatin         | 0      |             | 0.3731  | 1       | -1.2416 | 0       | 0        | -1      | 4.29  | -2.91  | 0.98  | 0.81    | 0.13  | 0.16  | 0.17 | 0.9  | 0.81   |
| 16 | atropine             | 1      |             | -0.3377 | 3       | -0.2493 | 1       | 1        | 1       | 9.98  | -2.78  | 0.18  | -0.29   | 0.06  | 0.09  | 0.10 | 0.27 | 0.52   |
| 17 | azithromycin         | 0      |             | 0.5099  | 1       | -2.3343 | 0       | 0        | 2       | 8.59  | -1.39  | 0.29  | 0.20    |       |       |      | 0.63 | 0.35   |
| 18 | betahistine          | 1      |             | -0.0505 | 3       | 0.1483  | 1       | 1        | 1       | 9.75  | -2.55  |       | -0.08   | 0.05  | 0.13  | 0.12 | 0.17 | 0.64   |
| 19 | betaxolol            | 0      |             | 0.2910  | 3       | -0.2645 | 1       | 1        | 1       | 9.43  | -2.23  | 0.5   | 0.71    | 0.11  | 0.21  | 0.21 | 0.66 | 1.28   |
| 20 | bilastine            |        |             | -0.7029 | 2       | -0.7082 | 1       | 0        | 0       | 6.59  | -0.61  | 0.87  | 0.23    | 0.07  | 0.10  | 0.10 | 0.46 | 0.56   |
| 21 | biperiden            | 1      |             | 0.5509  | 3       | 0.1715  | 1       | 1        | 1       | 9.26  | -2.06  | 0.6   | 0.40    | 0.17  | 0.22  | 0.21 | 0.68 | 2.77   |
| 22 | bisoprolol           | 0      |             | -0.4245 | 3       | -0.4122 | 1       | 1        | 1       | 9.42  | -2.22  | 0.3   | 1.68    | 0.09  | 0.21  | 0.20 | 0.67 | 1.09   |
| 23 | bromazepam           | 1      |             | -0.2717 | 3       | -0.3226 | 1       | 1        | 0       | 11.39 | -4.19  | 0.7   | 0.53    | 0.33  | 0.28  | 0.37 | 0.87 | 1.65   |
| 24 | bromocriptine        | 0      |             | -0.9295 | 1       | -1.3444 | 0       | 0        | 0       | 6.44  | -0.76  | 0.93  | 0.19    | 0.16  | 0.14  | 0.17 | 0.95 | 0.81   |
| 25 | bupivacaine          | 1      |             |         | 3       | 0.0296  | 1       | 1        | 1       | 8.13  | -0.93  | 0.95  | 0.24    | 0.14  | 0.23  | 0.22 | 0.67 | 2.07   |
| 26 | buspirone            | 1      |             | -0.7123 | 2       | -0.5672 | 1       | 1        | 1       | 7.72  | -0.52  | 0.95  | 0.17    | 0.11  | 0.15  | 0.15 | 0.57 | 0.83   |
| 27 | caffeine             | 1      |             | -0.8141 | 3       | -0.3092 | 1       | 1        | 0       | 0.52  | -6.68  | 0.3   | -6.31   | 0.24  | 0.42  | 0.49 | 0.82 | 1.53   |
| 28 | capecitabine         | 1      |             | -1.5667 | 1       | -1.3840 | 0       | 0        | 0       | 5.41  | -1.79  | 0.6   | -1.26   | 0.17  | 0.26  | 0.30 | 0.92 | 0.76   |
| 29 | captopril            | 1      |             | 0.1846  | 3       | -0.3748 | 1       | 1        | -1      | 3.59  | -3.61  | 0.275 | -0.24   | 0.21  | 0.35  | 0.40 | 0.77 | 1.28   |
| 30 | carbamazepine        | 1      | 0.76        | -4.8027 | 3       | -0.1943 | 1       | 1        | 0       | 13.94 | -6.74  | 0.76  | 0.36    | 0.33  | 0.40  | 0.43 | 0.95 | 2.04   |
| 31 | carbegoline          | 1      |             | -0.8778 | 2       | -0.5999 | 1       | 1        | 2       | 9.41  | -2.21  | 0.41  | -3.58   | 0.11  | 0.16  | 0.17 | 0.68 | 0.95   |
| 32 | carvedilol           | 0      |             | -0.1711 | 2       | -0.6642 | 1       | 0        | 1       | 8.24  | -1.04  | 0.98  | 0.22    | 0.13  | 0.17  | 0.18 | 0.73 | 1.19   |
| 33 | cefuroxime           | 0      |             | -3.1232 | 1       | -2.6380 | 0       | 0        | -1      | 2.59  | -4.61  | 0.5   | 0.33    | 0.23  | 0.23  | 0.26 | 0.97 | 0.49   |
| 34 | celecoxib            | 1      |             | 0.2940  | 2       | -0.7007 | 1       | 0        | 0       | 9.68  | -2.48  | 0.97  | 0.23    | 0.19  | 0.26  | 0.33 | 0.98 | 1.27   |
| 35 | celiprolol           |        |             | 0.0706  | 1       | -0.9074 | 0       | 0        | 1       | 9.5   | -2.3   | 0.275 | 2.05    | 0.07  | 0.12  | 0.13 | 0.45 | 0.51   |
| 36 | cephalexin           | 0      |             | -0.0601 | 3       | 0.0267  | 1       | 1        | 0       | 3.12  | -4.08  | 0.14  | -0.37   | 0.21  | 0.26  | 0.31 | 0.9  | 2.77   |
| 37 | cetirizine           | 1      |             | -0.3248 | 3       | -0.3012 | 1       | 1        | 0       | 3.46  | -3.74  | 0.93  | -0.57   | 0.13  | 0.17  | 0.19 | 0.64 | 1.22   |
| 38 | chloramphenikol      | 0      |             | -1.6066 | 1       | -1.2991 | 0       | 0        | 0       | 11.03 | -3.83  | 0.55  | 0.97    | 0.22  | 0.31  | 0.41 | 0.99 | 0.84   |
| 39 | chloroquine          | 1      |             |         | 3       | 0.0964  | 1       | 1        | 2       | 10.47 | -3.27  | 0.55  | 0.09    | 0.03  | 0.06  | 0.05 | 0.17 | 0.60   |
| 40 | chlorpromazine       | 1      | 3.41        | 0.2417  | 3       | 0.0385  | 1       | 1        | 1       | 9.41  | -2.21  | 0.9   | 0.13    | 0.14  | 0.13  | 0.16 | 0.43 | 1.34   |
| 41 | chlortalidone        | 1      |             | -1.7012 | 1       | -1.3389 | 0       | 0        | 0       | 9.57  | -2.37  | 0.75  | -1.30   | 0.25  | 0.30  | 0.38 | 0.96 | 0.81   |
| 42 | cimetidine           | 0      |             | -1.6407 | 1       | -1.2800 | 0       | 0        | 1       | 7.07  | -0.13  | 0.17  | -2.56   | 0.22  | 0.25  | 0.28 | 0.64 | 0.59   |
| 43 | ciprofloxacin        |        |             | -0.1422 | 2       | -0.6191 | 1       | 0        | 0       | 7.56  | -0.36  | 0.3   | -0.13   | 0.03  | 0.00  | 0.04 | 0.11 | 0.15   |
| 44 | cisapride            | 1      |             | -0.7925 | 2       | -0.8298 | 1       | 0        | 1       | 7.47  | -0.27  | 0.975 | 0.25    | 0.10  | 0.14  | 0.16 | 0.64 | 0.73   |
| 45 | citalopram           | 1      | 1.3         |         | 3       | -0.0332 | 1       | 1        | 1       | 9.57  | -2.37  | 0.8   | 0.77    | 0.05  | 0.09  | 0.10 | 0.3  | 0.80   |
| 46 | clarithromycin       | 0      |             | -2.5681 | 1       | -2.3796 | 0       | 0        | 1       | 8.16  | -0.96  | 0.7   | 0.42    |       |       |      | 0.99 | 0.54   |
| 47 | clindamycin          | 0      |             | 0.3807  | 1       | -1.1450 | 0       | 0        | 1       | 8.73  | -1.53  | 0.93  | 1.44    |       |       |      | 0.69 | 0.62   |
| 48 | clobazam             | 1      |             | -0.6696 | 3       | -0.0972 | 1       | 1        | -1      | 8.59  | -1.39  | 0.85  | 0.60    | 0.24  | 0.32  | 0.37 | 0.95 | 2.36   |
| 49 | clomipramine         | 1      |             |         | 3       | 0.4433  | 1       | 1        | 1       | 9.46  | -2.26  | 0.98  | 0.09    | 0.06  | 0.10  | 0.11 | 0.33 | 4.94   |
| 50 | clonidine            | 1      |             | -0.3575 | 3       | -0.0357 | 1       | 1        | 1       | 8.1   | -0.9   | 0.3   | -0.72   | 0.16  | 0.21  | 0.26 | 0.49 | 1.37   |
| 51 | clorazepate          | 1      |             | -0.9548 | 1       | -1.0874 | 0       | 0        | -1      | 5.3   | -1.9   | 0.975 | 0.61    | 0.32  | 0.30  | 0.37 | 0.94 | 0.92   |
| 52 | clozapine            | 1      | 3.83        | 0.3601  | 3       | 0.4952  | 1       | 1        | 1       | 7.33  | -0.13  | 0.99  | 0.09    | 0.12  | 0.16  | 0.16 | 0.45 | 14.04  |
| 53 | colchicine           | 1      |             |         | 2       | -0.7824 | 1       | 0        | 0       |       |        | 0.39  | 0.86    | 0.14  | 0.20  | 0.22 | 0.79 | 0.93   |
| 54 | cyproeptadine        | 1      |             | -0.0936 | 3       | 0.1049  | 1       | 1        | 1       | 8.95  | -1.75  | 0.975 | 0.18    | 0.12  | 0.17  | 0.17 | 0.45 | 1.54   |
| 55 | desloratidine        | 1      |             | -0.2192 | 3       | 0.1483  | 1       | 1        | 1       | 10.27 | -3.07  | 0.845 | 0.09    | 0.10  | 0.12  | 0.13 | 0.36 | 1.40   |
| 56 | diazepam             | 1      | 0.96        | 0.1130  | 3       | 0.0243  | 1       | 1        | 0       | 3.4   | -3.8   | 0.98  | 0.33    | 0.34  | 0.33  | 0.38 | 0.95 | 2.89   |
| 57 | digoxin              | 0      | 1.8         | -2.4604 | 1       | -2.7020 | 0       | 0        | 0       | 13.5  | -6.3   | 0.25  | 0.94    | 0.10  | 0.10  | 0.11 | 0.8  | 0.38   |
| 58 | dihydroergotamine    | 0      | 0.02        | -0.1817 | 1       | -1.3444 | 0       | 0        | 1       | 7.22  | -0.02  | 0.93  | 0.35    | 0.14  | 0.15  | 0.17 | 0.72 | 0.63   |
| 59 | diltiazem            | 1      |             |         | 3       | -0.3983 | 1       | 1        | 1       | 8.94  | -1.74  | 0.75  | 0.23    | 0.08  | 0.11  | 0.12 | 0.49 | 0.83   |
| 60 | diphenhydramin       | 1      |             | 0.2721  | 3       | 0.3475  | 1       | 1        | 1       | 8.76  | -1.56  | 0.985 | 0.18    | 0.09  | 0.16  | 0.16 | 0.42 | 2.61   |
| 61 | doxazosin            | 1      |             | 0.4643  | 1       | -1.4162 | 0       | 0        | 1       | 6.52  | -0.68  | 0.98  | 1.33    | 0.16  | 0.20  | 0.23 | 0.8  | 0.66   |
| 62 | doxepin              | 1      | 3.11        |         | 3       | 0.3475  | 1       | 1        | 1       | 9.4   | -2.2   | 0.755 | 0.14    | 0.06  | 0.11  | 0.11 | 0.3  | 2.49   |
| 63 | doxycycline          | 0      |             | -2.8317 | 1       | -2.3589 | 0       | 0        | 0       | 7.67  | -0.47  | 0.9   | -0.02   | 0.01  | 0.01  | 0.02 | 0.06 | 0.02   |
| 64 | drotaverine          | 1      |             | -0.8150 | 3       | -0.2362 | 1       | 1        | 1       | 6.17  | -1.03  | 0.875 | 0.10    | 0.10  | 0.15  | 0.16 | 0.61 | 1.21   |
| 65 | duloxetine           | 1      |             |         | 3       | 0.2068  | 1       | 1        | 1       | 10.02 | -2.82  | 0.9   | 0.26    | 0.07  | 0.11  | 0.11 | 0.32 | 1.55   |
| 66 | eletriptan           | 1      |             |         | 3       | -0.3037 | 1       | 1        | 1       | 10.35 | -3.15  | 0.85  | 0.81    | 0.06  | 0.08  | 0.08 | 0.29 | 0.53   |
| 67 | enalapril            | 0      |             | -0.9313 | 1       | -0.9880 | 0       | 0        | -1      | 3.15  | -4.05  | 0.55  | -0.14   | 0.08  | 0.09  | 0.09 | 0.33 | 0.34   |
| 68 | eplerenone           | 1      |             | -0.7308 | 2       | -0.7154 | 1       | 0        | 0       |       |        | 0.5   | 0.90    | 0.21  | 0.23  | 0.25 | 0.94 | 1.19   |
| 69 | escitalopram         | 1      |             | 0.2712  | 3       | -0.0332 | 1       | 1        | 1       | 9.57  | -2.37  | 0.56  | 1.08    | 0.08  | 0.13  | 0.14 | 0.42 | 1.16   |
| 70 | estradiol benzoate   |        |             | -0.9743 | 1       | -1.0674 | 0       | 0        | 0       |       |        | 0.95  | 0.39    | 0.20  | 0.26  | 0.27 | 0.97 | 1.62   |
| 71 | estrone              |        |             | -0.8728 | 1       | -1.0168 | 0       | 0        | 0       | 10.25 | -3.05  | 0.95  | 0.39    | 0.21  | 0.25  | 0.27 | 0.99 | 1.01   |
| 72 | ethambutol           | 0      |             |         | 3       | -0.4853 | 1       | 1        | 1       | 9.59  | -2.39  | 0.25  | -0.09   | 0.04  | 0.09  | 0.09 | 0.19 | 0.33   |
| 73 | ethanol              | 1      |             |         | 3       | 0.2233  | 1       | 1        | 0       |       |        |       |         |       |       |      |      |        |
| 74 | famotidine           | 1      |             | -3.5484 | 1       | -3.2570 | 0       | 0        | 1       | 7.93  | -0.73  | 0.175 | -0.69   | 0.14  | 0.21  | 0.26 | 0.7  | 0.30   |
| 75 | fexofenadine         | 0      |             | -0.4807 | 2       | -0.7490 | 1       | 0        | 0       | 6.93  | -0.27  | 0.65  | 0.27    | 0.10  | 0.12  | 0.13 | 0.61 | 0.73   |
| 76 | fluconazole          | 1      |             | -0.7958 | 2       | -0.6016 | 1       | 0        | 0       | 11.01 | -3.81  |       | 1.74    | 0.25  | 0.28  | 0.35 | 0.87 | 1.21   |
| 77 | fluoxetine           | 1      | 5.23        | 0.4324  | 3       | 0.2068  | 1       | 1        | 1       | 10.05 | -2.85  | 0.945 | 0.44    | 0.14  | 0.22  | 0.25 | 0.68 | 3.15   |
| 78 | flupenthixol         | 1      |             | 0.1794  | 3       | -0.2852 | 1       | 1        | 1       | 7.05  | -0.15  | 0.95  | 0.12    | 0.09  | 0.12  | 0.14 | 0.51 | 1.00   |
| 79 | fluvoxamine          | 1      |             |         | 3       | -0.3624 | 1       | 1        | 1       | 9.39  | -2.19  | 0.785 | 0.30    | 0.06  | 0.11  | 0.12 | 0.34 | 0.56   |
| 80 | furosemide           | 0      |             |         |         |         |         |          |         |       |        |       |         |       |       |      |      |        |

|     |                  |   |      |         |   |         |   |   |    |       |       |       |        |      |      |      |      |      |
|-----|------------------|---|------|---------|---|---------|---|---|----|-------|-------|-------|--------|------|------|------|------|------|
| 93  | ketoprofen       | 1 |      | 0.5281  | 3 | -0.3229 | 1 | 1 | -1 | 4.23  | -2.97 | 0.99  | -3.56  | 0.22 | 0.35 | 0.38 | 0.89 | 1.64 |
| 94  | ketorolac        | 1 |      |         | 3 | -0.4018 | 1 | 1 | -1 | 4.29  | -2.91 | 0.99  | -0.97  | 0.24 | 0.36 | 0.38 | 0.92 | 1.53 |
| 95  | ketotifen        | 1 |      | -0.5400 | 3 | -0.2298 | 1 | 1 | 1  | 8.84  | -1.64 | 0.75  | 0.10   | 0.09 | 0.11 | 0.12 | 0.34 | 0.74 |
| 96  | lamotrigine      | 1 | 4.86 | -0.9937 | 1 | -0.9044 | 1 | 0 | 0  | 5.39  | -1.81 | 0.55  | -4.68  | 0.28 | 0.35 | 0.46 | 0.89 | 0.99 |
| 97  | levetiracetam    | 1 |      |         | 3 | -0.4674 | 1 | 1 | 0  |       |       | 0.1   | -1.37  | 0.30 | 0.54 | 0.57 | 0.92 | 1.45 |
| 98  | levocetizine     | 1 |      | -0.1166 | 3 | -0.3012 | 1 | 1 | 0  | 3.46  | -3.74 | 0.915 | -0.56  | 0.11 | 0.16 | 0.18 | 0.63 | 1.21 |
| 99  | levofloxacin     |   |      | -0.8519 | 2 | -0.6261 | 1 | 0 | -1 | 5.19  | -2.01 | 0.31  | 0.26   | 0.04 | 0.05 | 0.06 | 0.17 | 0.23 |
| 100 | lincomycin       | 0 |      |         | 1 | -1.4687 | 0 | 0 | 1  | 8.78  | -1.58 | 0.7   | -1.90  | 0.14 | 0.22 | 0.23 | 0.91 | 0.72 |
| 101 | loperamide       | 0 |      | 0.2526  | 3 | -0.1535 | 1 | 1 | 1  | 7.76  | -0.56 | 0.97  | 0.19   | 0.14 | 0.14 | 0.16 | 0.68 | 1.53 |
| 102 | loratadine       | 1 |      | -0.4434 | 3 | -0.1319 | 1 | 1 | 0  | 4.27  | -2.93 | 0.98  | 0.16   | 0.19 | 0.25 | 0.28 | 0.94 | 2.22 |
| 103 | lorazepam        | 1 |      | -0.2542 | 3 | -0.4400 | 1 | 1 | 0  | 10.8  | -3.6  | 0.87  | 0.38   | 0.36 | 0.29 | 0.37 | 0.94 | 1.52 |
| 104 | medazepam        | 1 |      | 0.5602  | 3 | 0.2974  | 1 | 1 |    | 6.18  | -1.02 | 0.99  | 0.21   | 0.33 | 0.28 | 0.37 | 0.91 | 6.03 |
| 105 | meloxicam        | 0 |      | -2.0534 | 1 | -1.6325 | 0 | 0 | -1 | 4.5   | -2.7  | 0.99  | -11.00 | 0.25 | 0.28 | 0.37 | 0.99 | 0.72 |
| 106 | mesalazine       | 0 |      |         | 2 | -0.7898 | 1 | 0 | -1 | 1.9   | -5.3  | 0.43  | -0.36  | 0.38 | 0.61 | 0.73 | 0.94 | 1.11 |
| 107 | metformin        | 1 |      | 0.1922  | 2 | -0.8768 | 1 | 0 | 2  | 12.25 | -5.05 |       | -0.05  | 0.08 | 0.00 | 0.16 | 0.21 | 0.25 |
| 108 | methyl paraben   |   |      | -0.5512 | 3 | -0.1975 | 1 | 1 |    | 8.31  | -1.11 |       | 0.54   | 0.31 | 0.64 | 0.72 | 0.97 | 2.08 |
| 109 | methylidopa      | 0 |      | -1.6189 | 1 | -1.1135 | 0 | 0 | 0  | 5.57  | -1.63 | 0.2   | -0.16  | 0.11 | 0.18 | 0.21 | 0.38 | 0.35 |
| 110 | metoclopramide   | 1 | 0.4  | -0.6683 | 2 | -0.5344 | 1 | 0 | 1  | 9.08  | -1.88 |       | 14.50  | 0.05 | 0.10 | 0.10 | 0.29 | 0.43 |
| 111 | metoprolol       | 0 |      | 0.3776  | 3 | -0.2645 | 1 | 1 | 1  | 9.43  | -2.23 |       | 14.12  | 0.07 | 0.16 | 0.15 | 0.48 | 0.95 |
| 112 | mianserin        | 1 | 3.22 | 0.1860  | 3 | 0.4433  | 1 | 1 | 0  | 8.26  | -1.06 | 0.9   | 0.20   | 0.15 | 0.20 | 0.20 | 0.54 | 8.41 |
| 113 | midazolam        | 1 | 1.08 | 0.2836  | 3 | 0.1430  | 1 | 1 | 0  | 6.03  | -1.17 | 0.97  | 0.21   | 0.27 | 0.25 | 0.30 | 0.82 | 3.27 |
| 114 | minoxidil        | 1 |      |         | 1 | -0.9511 | 0 | 0 | 0  | 5.54  | -1.66 |       | 0.66   | 0.14 | 0.21 | 0.22 | 0.43 | 0.45 |
| 115 | mirtazapine      | 1 | 3.85 | 0.0286  | 3 | 0.2371  | 1 | 1 | 0  | 8.1   | -0.9  | 0.85  | 0.20   | 0.11 | 0.15 | 0.15 | 0.39 | 1.99 |
| 116 | montelukast      | 1 |      | 0.7668  | 2 | -0.5797 | 1 | 0 | -1 | 4.76  | -2.44 | 0.99  | 0.18   | 0.13 | 0.16 | 0.17 | 0.95 | 1.35 |
| 117 | naproxen         | 1 |      | -0.0952 | 3 | -0.1975 | 1 | 1 | -1 | 4.84  | -2.36 | 0.99  | 1.96   | 0.24 | 0.40 | 0.43 | 0.92 | 1.91 |
| 118 | nebivolol        | 1 |      | -0.0176 | 2 | -0.5882 | 1 | 0 | 1  | 8.65  | -1.45 | 0.98  | 0.31   | 0.15 | 0.18 | 0.21 | 0.75 | 1.06 |
| 119 | nitrendipine     | 0 |      |         | 1 | -1.2202 | 0 | 0 | 0  | 2.79  | -4.41 | 0.99  | 0.28   | 0.18 | 0.28 | 0.33 | 0.97 | 0.88 |
| 120 | ofloxacin        | 0 |      |         | 2 | -0.6261 | 1 | 0 | -1 | 5.19  | -2.01 | 0.32  | -0.37  | 0.05 | 0.07 | 0.08 | 0.24 | 0.31 |
| 121 | olanzapine       |   | 2.13 | -1.3427 | 2 | -0.7984 | 1 | 0 | 1  | 7.33  | -0.13 | 0.175 | -0.19  | 0.05 | 0.09 | 0.09 | 0.28 | 0.34 |
| 122 | oxazepam         | 1 |      | -0.3317 | 3 | -0.4400 | 1 | 1 | 0  | 10.94 | -3.74 | 0.85  | 0.40   | 0.34 | 0.32 | 0.34 | 0.93 | 1.52 |
| 123 | oxcarbamazepine  | 1 |      |         | 3 | -0.4674 | 1 | 1 | 0  | 13.73 | -6.53 | 0.4   | 0.73   | 0.30 | 0.36 | 0.40 | 0.91 | 1.42 |
| 124 | oxybutinin       | 1 |      | 0.6315  | 3 | -0.2493 | 1 | 1 | 1  | 8.24  | -1.04 | 0.92  | 0.12   | 0.12 | 0.19 | 0.19 | 0.68 | 1.33 |
| 125 | PABA             |   |      | -0.9106 | 3 | -0.4661 | 1 | 1 |    | 4.86  | -2.34 |       | -0.55  | 0.35 | 0.65 | 0.73 | 0.89 | 1.41 |
| 126 | pantoprazole     | 0 |      | -0.1483 | 2 | -0.8343 | 1 | 0 | 0  | 8.33  | -1.13 | 0.98  | 0.62   | 0.18 | 0.24 | 0.31 | 0.93 | 1.07 |
| 127 | paracetamol      | 1 | 0.73 | -0.7917 | 3 | -0.2423 | 1 | 1 | 0  | 9.86  | -2.66 | 0.25  | 2.74   | 0.31 | 0.62 | 0.67 | 0.93 | 1.90 |
| 128 | paroxetine       | 1 |      | 0.0645  | 3 | -0.0885 | 1 | 1 | 1  | 9.68  | -2.48 | 0.94  | 0.46   | 0.13 | 0.17 | 0.18 | 0.55 | 1.41 |
| 129 | pefloxacin       | 0 |      |         | 3 | -0.4784 | 1 | 1 | -1 | 0.16  | -7.04 | 0.25  | 0.58   | 0.06 | 0.09 | 0.10 | 0.3  | 0.45 |
| 130 | pergolide        | 1 | 3.19 | -0.1690 | 3 | -0.1623 | 1 | 1 | 1  | 7.98  | -0.78 | 0.9   | 0.21   | 0.11 | 0.15 | 0.16 | 0.48 | 1.06 |
| 131 | perindopril      | 0 |      | -0.9678 | 1 | -0.9880 | 0 | 0 | -1 | 3.15  | -4.05 | 0.15  | -47.00 | 0.09 | 0.13 | 0.13 | 0.47 | 0.47 |
| 132 | phenytoin        | 1 | 0.66 | -0.6114 | 3 | -0.3842 | 1 | 1 | 0  | 6.32  | -0.88 | 0.9   | 0.39   | 0.29 | 0.38 | 0.43 | 0.97 | 1.67 |
| 133 | pindolol         | 1 |      | -0.0480 | 3 | -0.3695 | 1 | 1 | 1  | 9.54  | -2.34 | 0.4   | 2.79   | 0.12 | 0.21 | 0.22 | 0.53 | 0.91 |
| 134 | piroxicam        | 0 |      | -1.2965 | 1 | -1.1807 | 0 | 0 | -1 | 4.5   | -2.7  | 0.99  | -0.46  | 0.37 | 0.29 | 0.39 | 0.98 | 0.91 |
| 135 | prednisolone     | 1 |      | -0.9590 | 1 | -0.9703 | 0 | 0 | 0  | 12.46 | -5.26 | 0.9   | 0.63   | 0.24 | 0.27 | 0.30 | 0.94 | 0.99 |
| 136 | pregabalin       | 1 |      |         | 3 | -0.4661 | 1 | 1 | 0  | 7.77  | -0.57 |       | -0.55  | 0.21 | 0.48 | 0.46 | 0.76 | 1.20 |
| 137 | primidone        | 1 | 0.38 |         | 3 | -0.3842 | 1 | 1 | 0  | 12.26 | -5.06 | 0.7   | 2.25   | 0.28 | 0.41 | 0.45 | 0.9  | 1.60 |
| 138 | progesterone     |   |      | -0.0754 | 3 | -0.1975 | 1 | 1 | 0  |       |       | 0.975 | 0.15   | 0.21 | 0.25 | 0.27 | 0.96 | 2.06 |
| 139 | promazine        | 1 |      | 0.1627  | 3 | 0.0385  | 1 | 1 | 1  | 9.43  | -2.23 | 0.94  | 0.15   | 0.13 | 0.14 | 0.15 | 0.39 | 1.16 |
| 140 | promethazine     | 1 |      | -0.3617 | 3 | 0.0385  | 1 | 1 | 1  | 8.98  | -1.78 | 0.93  | 0.13   | 0.10 | 0.15 | 0.16 | 0.43 | 1.32 |
| 141 | propafenone      | 0 |      | 0.4217  | 3 | -0.3900 | 1 | 1 | 1  | 9.31  | -2.11 | 0.97  | 0.28   | 0.11 | 0.17 | 0.17 | 0.57 | 1.01 |
| 142 | propranolol      | 1 |      | -0.0495 | 3 | -0.1168 | 1 | 1 | 1  | 9.5   | -2.3  | 0.9   | 0.43   | 0.17 | 0.21 | 0.21 | 0.54 | 1.21 |
| 143 | propylthiouracil | 1 |      |         | 3 | -0.1111 | 1 | 1 | 0  | 7.63  | -0.43 | 0.82  | 0.80   | 0.28 | 0.55 | 0.62 | 0.94 | 2.29 |
| 144 | pseudoephedrine  | 1 |      | 0.2682  | 3 | 0.0308  | 1 | 1 | 1  | 9.38  | -2.18 |       | -0.99  | 0.27 | 0.54 | 0.52 | 0.89 | 2.76 |
| 145 | quetiapine       | 1 | 1.26 | -0.5186 | 2 | -0.6306 | 1 | 0 | 1  | 6.74  | -0.46 | 0.83  | 0.44   | 0.13 | 0.18 | 0.19 | 0.68 | 0.92 |
| 146 | quinapril        | 0 |      | 0.3959  | 1 | -0.9880 | 0 | 0 | -1 | 3.39  | -3.81 | 0.97  | 0.52   | 0.07 | 0.10 | 0.11 | 0.44 | 0.46 |
| 147 | quinine          | 1 |      |         | 3 | -0.1824 | 1 | 1 | 1  | 9.28  | -2.08 | 0.7   | 0.19   | 0.07 | 0.10 | 0.10 | 0.3  | 0.64 |
| 148 | ranitidine       | 0 |      | -1.6914 | 1 | -1.2380 | 0 | 0 | 1  | 8.35  | -1.15 |       | 1.26   | 0.04 | 0.08 | 0.08 | 0.24 | 0.22 |
| 149 | rifampicin       | 0 |      |         | 1 | -2.9754 | 0 | 0 | 1  | 4.96  | -2.24 | 0.89  | -1.59  |      | 0.09 |      | 0.73 | 0.35 |
| 150 | rimantadine      | 1 |      |         | 3 | 0.1307  | 1 | 1 | 1  | 10.76 | -3.56 | 0.4   | 11.36  | 0.38 | 0.51 | 0.48 | 0.92 | 3.54 |
| 151 | risperidone      | 1 | 0.21 | -0.6820 | 3 | -0.4440 | 1 | 1 | 1  | 8.07  | -0.87 | 0.88  | 0.13   | 0.06 | 0.07 | 0.08 | 0.29 | 0.46 |
| 152 | rizatriptan      | 1 | 0.04 | -0.7769 | 3 | -0.3988 | 1 | 1 | 1  | 9.49  | -2.29 | 0.14  | 0.07   | 0.05 | 0.06 | 0.07 | 0.2  | 0.33 |
| 153 | rosuvastatin     | 0 |      | 0.3184  | 1 | -1.7077 | 0 | 0 | -1 | 4.25  | -2.95 | 0.88  | -0.34  | 0.13 | 0.19 | 0.22 | 0.9  | 0.63 |
| 154 | roxitromicin     | 0 |      | 0.5798  | 1 | -2.9232 | 0 | 0 | 1  | 8.16  | -0.96 | 0.96  | 0.31   |      |      |      | 0.91 | 0.42 |
| 155 | rupatadine       |   |      | -0.0427 | 3 | 0.0827  | 1 | 1 | 1  | 6.95  | -0.25 | 0.985 | 0.07   | 0.08 | 0.10 | 0.11 | 0.42 | 1.48 |
| 156 | sertraline       | 1 | 2.67 | 0.3944  | 3 | 0.3545  | 1 | 1 | 1  | 9.47  | -2.27 | 0.98  | 0.19   | 0.13 | 0.17 | 0.20 | 0.53 | 4.41 |
| 157 | sildenafil       | 1 |      | -0.0844 | 1 | -1.1991 | 0 | 0 | 0  | 6.03  | -1.17 | 0.96  | 0.30   | 0.11 | 0.15 | 0.16 | 0.69 | 0.61 |
| 158 | simvastatin      | 1 |      | -0.2655 | 2 | -0.6183 | 1 | 0 | 0  | 13.49 | -6.29 | 0.95  | 0.04   | 0.03 | 0.05 | 0.05 | 0.19 | 0.23 |
| 159 | sotalol          | 1 |      | -1.2142 | 2 | -0.8420 | 1 | 0 | 1  | 9.31  | -2.11 |       | -0.33  | 0.09 | 0.18 | 0.19 | 0.48 | 0.52 |
| 160 | spironolactone   | 1 |      | -0.6238 | 2 | -0.8248 | 1 | 0 | 0  |       |       | 0.9   | 0.31   | 0.20 | 0.24 | 0.26 | 0.98 | 1.11 |
| 161 | sulpiride        | 1 |      | -1.4177 | 1 | -1.2148 | 0 | 0 | 1  | 8.97  | -1.77 | 0.4   | -0.24  | 0.05 | 0.08 | 0.09 | 0.27 | 0.24 |
| 162 | telmisartan      | 1 |      | 0.3287  | 3 | -0.4623 | 1 | 1 | -1 | 3.86  | -3.34 | 0.995 | 0.19   | 0.14 | 0.18 | 0.19 | 0.9  | 1.42 |
| 163 | temazepam        | 1 | 0.8  | -0.1651 | 3 | -0.2994 | 1 | 1 | 0  | 11.66 | -4.46 | 0.96  | 0.44   | 0.33 | 0.31 | 0.37 | 0.94 | 1.77 |
| 164 | theophylline     | 1 |      | -1.0858 | 2 | -0.5618 | 1 | 0 | 0  | 8.6   | -1.4  | 0.4   | -4.30  | 0.29 | 0.48 | 0.57 | 0.86 | 1.25 |
| 165 | thioridazine     | 1 | 3.5  | -0.0704 | 3 | -0.3663 | 1 | 0 | 1  | 9.84  | -2.64 | 0.95  | 0.12   | 0.10 | 0.13 | 0.13 | 0.47 | 0.75 |
| 166 | timolol          | 0 |      |         | 2 | -0.7288 | 1 | 0 | 1  | 9.35  | -2.15 | 0.1   | -0.24  | 0.07 | 0.11 | 0.12 | 0.34 | 0.40 |
| 167 | tinidazole       | 1 |      |         | 1 | -1.0175 | 0 | 0 | 0  | 2.3   | -4.9  | 0.12  | -3.30  | 0.20 | 0.36 | 0.45 | 0.89 | 0.90 |
| 168 | tolterodine      | 1 |      | 0.6315  | 3 | 0.1715  | 1 | 1 | 1  | 10.68 | -3.48 | 0.963 | 0.03   | 0.02 | 0.03 | 0.03 | 0.1  | 0.34 |
| 169 | tramadol         | 1 |      |         | 3 | 0.0238  | 1 | 1 | 1  | 9.61  | -2.41 | 0.2   | 0.86   |      | 0.12 |      | 0.31 | 0.95 |
| 170 | trazodone        | 1 | 1.54 | -0.0628 | 3 | -0.1312 | 1 | 1 | 1  | 7.52  | -0.32 | 0.92  | 0.45   | 0.14 | 0.19 | 0.21 | 0.71 | 1.69 |
| 171 | trimethoprim     | 1 |      |         | 1 | -1.1412 | 0 | 0 | 1  | 6.9   | -0.3  | 0.44  | 0.98   | 0.14 | 0.20 | 0.22 | 0.57 | 0.56 |
| 172 | tropicamid       | 1 |      | 0.1375  | 3 | -0.3079 | 1 | 1 | 0  | 5.32  | -1.88 | 0.45  | 0.74   | 0.20 | 0.30 | 0.31 |      |      |
