# Supplementary material for: Chromatographic Data in Statistical Analysis of BBB Permeability Indices
Source: MDPI journal article supplement (doi:10.3390/membranes13070623), 2023-06-26
Supplement: s1 [file s1]

Table S3. Correlation matrix of molecular descriptors

|                         | mean   | SD     | B1     | B2     | B2>-0.9 | B2>-0.52 | CNS+/- | K <sub>p.uu,brain</sub> | PhCharg | pKa    | logU/D | PB     | NP     | RP     | MW     | PSA    | HD     | HA     | HA+D   | DM     | eH     | eL     | eH-eL  | logD   | Sa     | V      | logP   | logkIAM |
|-------------------------|--------|--------|--------|--------|---------|----------|--------|-------------------------|---------|--------|--------|--------|--------|--------|--------|--------|--------|--------|--------|--------|--------|--------|--------|--------|--------|--------|--------|---------|
| B1                      | -0.490 | 0.947  | 1.000  | 0.519  | 0.378   | 0.335    | 0.194  | 0.301                   | 0.231   | 0.070  | 0.182  | 0.277  | -0.147 | -0.370 | 0.054  | -0.516 | -0.467 | -0.389 | -0.484 | -0.166 | 0.026  | 0.208  | -0.030 | 0.190  | 0.106  | 0.127  | 0.315  | 0.397   |
| B2                      | -0.605 | 0.692  | 0.519  | 1.000  | 0.780   | 0.750    | 0.570  | 0.274                   | 0.075   | 0.166  | 0.034  | 0.204  | -0.257 | -0.294 | -0.036 | -0.998 | -0.765 | -0.850 | -0.927 | -0.228 | 0.047  | 0.176  | -0.292 | 0.209  | -0.221 | -0.252 | 0.213  | 0.390   |
| B2>-0.9                 | 0.729  | 0.446  | 0.378  | 0.780  | 1.000   | 0.692    | 0.550  | 0.180                   | 0.137   | 0.197  | 0.019  | 0.081  | -0.213 | -0.211 | 0.044  | -0.773 | -0.519 | -0.653 | -0.681 | -0.200 | 0.115  | 0.131  | -0.177 | 0.225  | -0.146 | -0.194 | 0.136  | 0.326   |
| B2>-0.52                | 0.564  | 0.497  | 0.335  | 0.750  | 0.692   | 1.000    | 0.521  | -0.044                  | 0.171   | 0.157  | -0.025 | 0.129  | -0.130 | -0.187 | -0.128 | -0.744 | -0.499 | -0.653 | -0.673 | -0.189 | 0.090  | 0.176  | -0.139 | 0.205  | -0.228 | -0.221 | 0.177  | 0.277   |
| CNS+/-                  | 0.719  | 0.451  | 0.194  | 0.570  | 0.550   | 0.521    | 1.000  | 0.178                   | 0.070   | 0.225  | 0.035  | 0.202  | -0.073 | -0.064 | 0.008  | -0.570 | -0.518 | -0.548 | -0.608 | -0.218 | 0.010  | 0.018  | -0.175 | 0.229  | -0.279 | -0.282 | 0.164  | 0.263   |
| K <sub>u,pp,brain</sub> | 1.880  | 1.468  | 0.301  | 0.274  | 0.180   | -0.044   | 0.178  | 1.000                   | 0.142   | -0.088 | 0.124  | 0.237  | -0.189 | -0.519 | -0.026 | -0.274 | -0.155 | -0.259 | -0.239 | -0.089 | 0.276  | 0.042  | 0.207  | 0.174  | 0.047  | -0.020 | 0.312  | 0.474   |
| PhCharg                 | 0.354  | 0.859  | 0.231  | 0.075  | 0.137   | 0.171    | 0.070  | 0.142                   | 1.000   | 0.548  | 0.312  | -0.148 | -0.428 | -0.302 | 0.028  | -0.073 | 0.060  | 0.011  | 0.035  | -0.146 | 0.162  | 0.197  | 0.122  | 0.056  | 0.177  | 0.053  | -0.093 | 0.423   |
| pKa                     | 7.613  | 2.757  | 0.070  | 0.166  | 0.197   | 0.157    | 0.225  | -0.088                  | 0.548   | 1.000  | 0.009  | -0.022 | -0.269 | -0.232 | 0.043  | -0.166 | -0.059 | -0.157 | -0.134 | -0.193 | -0.028 | 0.167  | -0.020 | 0.108  | -0.014 | -0.034 | 0.012  | 0.353   |
| logU/D                  | -2.324 | 1.530  | 0.182  | 0.034  | 0.019   | -0.025   | 0.035  | 0.124                   | 0.312   | 0.009  | 1.000  | 0.146  | -0.131 | -0.246 | 0.048  | -0.034 | -0.053 | 0.043  | 0.006  | -0.003 | 0.274  | 0.006  | 0.179  | 0.028  | 0.178  | 0.133  | 0.004  | 0.249   |
| PB                      | 0.722  | 0.300  | 0.277  | 0.204  | 0.081   | 0.129    | 0.202  | 0.237                   | -0.148  | -0.022 | 0.146  | 1.000  | 0.200  | -0.190 | -0.101 | -0.208 | -0.303 | -0.183 | -0.261 | -0.037 | 0.141  | -0.121 | 0.042  | 0.355  | 0.107  | 0.256  | 0.439  | 0.364   |
| NP                      | 0.662  | 0.265  | -0.147 | -0.257 | -0.213  | -0.130   | -0.073 | -0.189                  | -0.428  | -0.269 | -0.131 | 0.200  | 1.000  | 0.539  | -0.190 | 0.251  | 0.119  | 0.161  | 0.164  | 0.000  | -0.157 | -0.047 | -0.019 | -0.039 | -0.204 | -0.025 | 0.128  | -0.124  |
| RP                      | 0.723  | 0.194  | -0.370 | -0.294 | -0.211  | -0.187   | -0.064 | -0.519                  | -0.302  | -0.232 | -0.246 | -0.190 | 0.539  | 1.000  | -0.124 | 0.297  | 0.193  | 0.202  | 0.225  | 0.020  | -0.076 | -0.057 | -0.131 | -0.190 | -0.167 | -0.217 | -0.132 | -0.340  |
| MW                      | 5.912  | 26.390 | 0.054  | -0.036 | 0.044   | -0.128   | 0.008  | -0.026                  | 0.028   | 0.043  | 0.048  | -0.101 | -0.190 | -0.124 | 1.000  | 0.036  | 0.057  | 0.069  | 0.074  | 0.079  | 0.031  | -0.014 | 0.021  | -0.060 | -0.031 | -0.029 | -0.103 | -0.054  |
| PSA                     | 7.178  | 4.318  | -0.516 | -0.998 | -0.773  | -0.744   | -0.570 | -0.274                  | -0.073  | -0.166 | -0.034 | -0.208 | 0.251  | 0.297  | 0.036  | 1.000  | 0.771  | 0.852  | 0.932  | 0.222  | -0.038 | -0.178 | 0.298  | -0.211 | 0.220  | 0.249  | -0.221 | -0.394  |
| HD                      | 1.757  | 1.728  | -0.467 | -0.765 | -0.519  | -0.499   | -0.518 | -0.155                  | 0.060   | -0.059 | -0.053 | -0.303 | 0.119  | 0.193  | 0.057  | 0.771  | 1.000  | 0.530  | 0.815  | 0.036  | 0.024  | 0.020  | 0.171  | -0.176 | 0.043  | 0.052  | -0.305 | -0.308  |
| HA                      | 4.801  | 2.611  | -0.389 | -0.850 | -0.653  | -0.653   | -0.548 | -0.259                  | 0.011   | -0.157 | 0.043  | -0.183 | 0.161  | 0.202  | 0.069  | 0.852  | 0.530  | 1.000  | 0.923  | 0.260  | 0.003  | -0.161 | 0.384  | -0.230 | 0.361  | 0.402  | -0.099 | -0.357  |
| HA+D                    | 6.558  | 3.819  | -0.484 | -0.927 | -0.681  | -0.673   | -0.608 | -0.239                  | 0.035   | -0.134 | 0.006  | -0.261 | 0.164  | 0.225  | 0.074  | 0.932  | 0.815  | 0.923  | 1.000  | 0.190  | 0.014  | -0.096 | 0.341  | -0.237 | 0.260  | 0.292  | -0.209 | -0.390  |
| DM                      | 3.673  | 2.362  | -0.166 | -0.228 | -0.200  | -0.189   | -0.218 | -0.089                  | -0.146  | -0.193 | -0.003 | -0.037 | 0.000  | 0.020  | 0.079  | 0.222  | 0.036  | 0.260  | 0.190  | 1.000  | -0.007 | -0.316 | 0.228  | -0.132 | -0.026 | 0.041  | -0.119 | -0.119  |
| eH                      | -9.013 | 0.700  | 0.026  | 0.047  | 0.115   | 0.090    | 0.010  | 0.276                   | 0.162   | -0.028 | 0.274  | 0.141  | -0.157 | -0.076 | 0.031  | -0.038 | 0.024  | 0.003  | 0.014  | -0.007 | 1.000  | 0.042  | 0.678  | 0.157  | 0.117  | 0.131  | 0.056  | 0.280   |
| eL                      | -3.300 | 7.268  | 0.208  | 0.176  | 0.131   | 0.176    | 0.018  | 0.042                   | 0.197   | 0.167  | 0.006  | -0.121 | -0.047 | -0.057 | -0.014 | -0.178 | 0.020  | -0.161 | -0.096 | -0.316 | 0.042  | 1.000  | -0.706 | -0.095 | -0.157 | -0.115 | 0.028  | -0.041  |
| eH-eL                   | -8.440 | 1.734  | -0.030 | -0.292 | -0.177  | -0.139   | -0.175 | 0.207                   | 0.122   | -0.020 | 0.179  | 0.042  | -0.019 | -0.131 | 0.021  | 0.298  | 0.171  | 0.384  | 0.341  | 0.228  | 0.678  | -0.706 | 1.000  | 0.135  | 0.198  | 0.177  | 0.094  | 0.030   |
| logD                    | 0.883  | 3.904  | 0.190  | 0.209  | 0.225   | 0.205    | 0.229  | 0.174                   | 0.056   | 0.108  | 0.028  | 0.355  | -0.039 | -0.190 | -0.060 | -0.211 | -0.176 | -0.230 | -0.237 | -0.132 | 0.157  | -0.095 | 0.135  | 1.000  | 0.189  | 0.161  | 0.220  | 0.361   |
| Sa                      | 4.550  | 1.263  | 0.106  | -0.221 | -0.146  | -0.228   | -0.279 | 0.047                   | 0.177   | -0.014 | 0.178  | 0.107  | -0.204 | -0.167 | -0.031 | 0.220  | 0.043  | 0.361  | 0.260  | -0.026 | 0.117  | -0.157 | 0.198  | 0.189  | 1.000  | 0.772  | 0.147  | 0.337   |
| V                       | 3.021  | 0.956  | 0.127  | -0.252 | -0.194  | -0.221   | -0.282 | -0.020                  | 0.053   | -0.034 | 0.133  | 0.256  | -0.025 | -0.217 | -0.029 | 0.249  | 0.052  | 0.402  | 0.292  | 0.041  | 0.131  | -0.115 | 0.177  | 0.161  | 0.772  | 1.000  | 0.350  | 0.361   |
| logP                    | 1.150  | 2.027  | 0.315  | 0.213  | 0.136   | 0.177    | 0.164  | 0.312                   | -0.093  | 0.012  | 0.004  | 0.439  | 0.128  | -0.132 | -0.103 | -0.221 | -0.305 | -0.099 | -0.209 | -0.119 | 0.056  | 0.028  | 0.094  | 0.220  | 0.147  | 0.350  | 1.000  | 0.226   |
| logkIAM                 | 0.450  | 0.923  | 0.397  | 0.390  | 0.326   | 0.277    | 0.263  | 0.474                   | 0.423   | 0.353  | 0.249  | 0.364  | -0.124 | -0.340 | -0.054 | -0.394 | -0.308 | -0.357 | -0.390 | -0.119 | 0.280  | -0.041 | 0.030  | 0.361  | 0.337  | 0.361  | 0.226  | 1.000   |
