# Supplementary material for: Chromatographic Data in Statistical Analysis of BBB Permeability Indices
Source: MDPI journal article supplement (doi:10.3390/membranes13070623), 2023-06-26
Supplement: s1 [file s1]

Table S1b. Dataset of 181 APIs

|    | API                  | RP/logD | RP/Sa | RP/MW | RP/V | RP   | RP/PSA | NP/PB | RP/PB | NP/logP | RP/logP | MW/100 | PSA/10 | HD | HA | HA+D | DM    | eH     | eL×10  | eH-eL | logD  | Sa/100 | V/100 | logP  | k(IAM) | logkIAM | logIAM/PSA | logIAM/PB | logIAM/logP |
|----|----------------------|---------|-------|-------|------|------|--------|-------|-------|---------|---------|--------|--------|----|----|------|-------|--------|--------|-------|-------|--------|-------|-------|--------|---------|------------|-----------|-------------|
| 1  | acebutolol           | 3.00    | 0.12  | 0.23  | 0.24 | 0.78 | 0.94   | 1.77  | 3.15  | -1.39   | -2.48   | 3.36   | 8.77   | 3  | 5  | 8    | 2.65  | -9.19  | -5.11  | -8.68 | 0.26  | 6.33   | 3.29  | -0.33 | 5.06   | 0.70    | -1.24      | 1.29      | -2.13       |
| 2  | aceclofenac          | 2.11    | 0.21  | 0.26  | 0.33 | 0.93 | 1.23   | 0.91  | 0.94  | 0.25    | 0.26    | 3.54   | 7.56   | 2  | 5  | 7    | 1.93  | -8.85  | -2.68  | -8.58 | 0.44  | 4.44   | 2.84  | 3.54  | 2.63   | 0.42    | -1.46      | 0.42      | -0.13       |
| 3  | acenocumarol         | 2.74    | 0.20  | 0.26  | 0.31 | 0.93 | 0.84   | 0.99  | 0.93  | 0.37    | 0.34    | 3.53   | 10.94  | 1  | 7  | 8    | 8.94  | -9.74  | -14.71 | -8.27 | 0.34  | 4.66   | 2.96  | 2.68  | 0.53   | -0.27   | -2.31      | -0.27     | -0.70       |
| 4  | acetazolamid         | -1.76   | 0.21  | 0.35  | 0.33 | 0.97 | 0.83   | 0.96  | 0.98  | 0.40    | 0.41    | 2.77   | 11.50  | 2  | 5  | 7    | 0.89  | -9.06  | 0.69   | -9.13 | -0.55 | 4.69   | 2.90  | 2.36  |        |         |            |           |             |
| 5  | acetylsalicylic acid | -0.52   | 0.32  | 0.54  | 0.64 | 0.98 | 1.56   | 0.90  | 0.99  | 0.69    | 0.76    | 1.80   | 6.36   | 1  | 4  | 5    | 5.18  | -9.78  | -6.93  | -9.08 | -1.89 | 3.05   | 1.52  | 1.3   | 0.03   | -1.52   | -3.32      | -1.51     | -1.63       |
| 6  | aciclovir            | -0.56   | 0.28  | 0.44  | 0.53 | 0.99 | 0.89   | 3.45  | 4.67  | -0.50   | -0.68   | 2.25   | 10.98  | 4  | 8  | 12   | 5.69  | -8.76  | -4.89  | -8.27 | -1.76 | 3.59   | 1.86  | -1.45 | 0.09   | -1.04   | -3.08      | -0.36     |             |
| 7  | allopurinol          | -1.02   | 0.47  | 0.71  | 0.90 | 0.97 | 1.41   |       |       | -0.95   | -1.00   | 1.36   | 6.59   | 2  | 5  | 7    | 8.84  | -8.77  | -10.78 | -7.69 | -0.95 | 2.06   | 1.08  | -0.93 |        |         |            |           |             |
| 8  | alprazolam           | 0.32    | 0.27  | 0.26  | 0.30 | 0.8  | 2.05   | 1.08  | 0.98  | 0.18    | 0.17    | 3.09   | 3.81   | 0  | 4  | 4    | 6.16  | -9.51  | -1.42  | -9.36 | 2.5   | 2.94   | 2.69  | 4.68  | 3.14   | 0.50    | -1.08      | 0.59      | -0.17       |
| 9  | amiodarone           | 0.05    | 0.06  | 0.05  | 0.07 | 0.33 | 0.80   | 0.63  | 0.35  | 0.20    | 0.11    | 6.45   | 4.27   | 0  | 3  | 3    | 5.30  | -7.46  | -33.48 | -4.11 | 6.94  | 5.21   | 4.46  | 3.01  | 99.63  | 2.00    | 0.37       | 2.02      | 1.52        |
| 10 | amitriptyline        | 0.21    | 0.19  | 0.30  | 0.43 | 0.67 | 19.44  | 0.33  | 0.66  | 0.70    | 1.43    | 2.22   | 0.32   | 0  | 1  | 1    | 6.42  | -9.90  | -17.01 | -8.20 | 3.15  | 3.61   | 1.56  | 0.44  |        |         |            |           |             |
| 11 | amlodipine           | 0.24    | 0.10  | 0.15  | 0.17 | 0.61 | 0.68   | 0.57  | 0.70  | -0.37   | -0.45   | 4.09   | 9.99   | 2  | 5  | 7    | 2.88  | -8.66  | -3.35  | -8.32 | 2.59  | 5.92   | 3.62  | -1.51 | 98.90  | 2.00    | 0.00       | 2.01      | -1.32       |
| 12 | amoxicillin          | -0.41   | 0.20  | 0.27  | 0.32 | 0.99 | 0.62   | 3.40  | 4.90  | -4.53   | -6.53   | 3.65   | 15.83  | 5  | 8  | 13   | 4.32  | -9.20  | -3.31  | -8.87 | -2.43 | 4.88   | 3.07  | -0.15 | 0.05   | -1.32   | -3.52      | -0.62     | 8.80        |
| 13 | astemizol            | 0.16    | 0.11  | 0.14  | 0.15 | 0.65 | 1.66   | 0.63  | 0.64  | 0.86    | 0.87    | 4.59   | 3.74   | 1  | 5  | 6    | 1.71  | -7.83  | -3.07  | -7.52 | 4.08  | 6.02   | 4.22  | 0.71  | 26.27  | 1.42    | -0.15      | 1.43      | 1.57        |
| 14 | atenolol             | -0.33   | 0.20  | 0.22  | 0.25 | 0.58 | 0.66   | 3.00  | 5.09  | 0.40    | 0.67    | 2.66   | 8.46   | 4  | 5  | 9    | 6.13  | -9.33  | 2.61   | -9.59 | -1.74 | 2.95   | 2.34  | 0.83  | 0.79   | -0.10   | -2.03      |           | -0.02       |
| 15 | atorvastatin         | 0.72    | 0.12  | 0.14  | 0.15 | 0.8  | 0.80   | 0.92  | 0.91  | 0.58    | 0.58    | 5.63   | 11.18  | 4  | 5  | 9    | 2.22  | -9.00  | -1.40  | -8.86 | 1.11  | 6.75   | 5.21  | 1.54  | 8.28   | 0.92    | -1.13      | 0.93      | 0.73        |
| 16 | atropine             | -0.78   | 0.17  | 0.25  | 0.26 | 0.73 | 1.45   | 1.44  | 4.00  | 0.15    | 0.42    | 2.89   | 4.98   | 1  | 4  | 5    | 2.48  | -9.42  | 0.41   | -9.46 | -0.94 | 4.24   | 2.79  | 1.71  | 3.91   | 0.59    | -1.10      | 1.34      | 0.36        |
| 17 | azithromycin         | 0.08    |       |       |      | 0.24 | 0.13   | 2.17  | 0.83  | 0.26    | 0.10    |        | 18.01  | 5  | 13 | 18   |       |        |        | 0.00  | 3.18  |        |       | 2.44  | 0.06   | -1.20   | -3.46      | -0.66     | -1.59       |
| 18 | betahistine          | -0.14   | 0.09  | 0.23  | 0.21 | 0.31 | 1.32   | 4.00  | 8.25  | 0.14    | 0.28    | 1.36   | 2.49   | 1  | 2  | 3    | 2.91  | -9.24  | -0.60  | -9.18 | -2.18 | 3.27   | 1.44  | 1.18  | 0.90   | -0.05   | -1.44      |           | -0.12       |
| 19 | betaxolol            | 0.29    | 0.05  | 0.09  | 0.09 | 0.27 | 0.49   | 1.30  | 0.50  | 0.65    | 0.25    | 3.07   | 5.07   | 2  | 4  | 6    | 1.20  | -8.98  | 4.43   | -9.42 | 0.93  | 5.89   | 3.15  | 1     | 15.60  | 1.19    | -0.51      | 1.49      | 1.19        |
| 20 | bilastine            | 0.39    | 0.11  | 0.16  | 0.17 | 0.76 | 0.92   | 0.51  | 0.83  | 0.21    | 0.34    | 4.64   | 7.85   | 2  | 6  | 8    | 2.69  | -8.82  | -1.22  | -8.70 | 1.97  | 6.65   | 4.54  | 2.1   | 0.55   | -0.26   | -2.15      | -0.20     | -0.58       |
| 21 | biperiden            | 0.52    | 0.21  | 0.28  | 0.27 | 0.87 | 3.62   | 1.08  | 1.42  | 0.24    | 0.31    | 3.11   | 2.35   | 1  | 2  | 3    | 2.30  | -9.16  | 3.22   | -9.48 | 1.68  | 4.11   | 3.20  | 2.71  | 41.47  | 1.62    | 0.25       | 1.84      | 1.18        |
| 22 | bisoprolol           | 1.43    | 0.08  | 0.18  | 0.17 | 0.57 | 0.93   | 2.18  | 1.87  | 0.31    | 0.26    | 3.25   | 6.00   | 2  | 5  | 7    | 1.93  | -9.09  | 3.27   | -9.42 | 0.4   | 7.05   | 3.31  | 2.13  | 6.74   | 0.83    | -0.95      | 1.35      | 0.50        |
| 23 | bromazepam           | 0.50    | 0.31  | 0.26  | 0.35 | 0.83 | 1.49   | 1.28  | 1.16  | 0.35    | 0.31    | 3.16   | 5.44   | 1  | 4  | 5    | 2.87  | -9.13  | -1.07  | -9.02 | 1.65  | 2.67   | 2.36  | 2.59  | 2.21   | 0.34    | -1.39      | 0.50      | -0.07       |
| 24 | bromocriptine        | 0.14    | 0.11  | 0.10  | 0.12 | 0.69 | 0.59   | 1.03  | 0.75  | 0.21    | 0.16    | 6.69   | 11.82  | 3  | 10 | 13   | 4.25  | -8.92  | -9.58  | -7.96 | 5.07  | 6.06   | 5.64  | 4.48  | 12.69  | 1.10    | -0.97      | 1.13      | 0.45        |
| 25 | bupivacaine          | 0.26    | 0.15  | 0.26  | 0.25 | 0.74 | 2.32   | 0.71  | 0.79  | 0.18    | 0.20    | 2.88   | 3.23   | 1  | 2  | 3    | 3.02  | -9.03  | 3.37   | -9.37 | 2.8   | 4.78   | 3.02  | 3.82  |        |         |            |           |             |
| 26 | buspirone            | 0.21    | 0.13  | 0.18  | 0.19 | 0.7  | 0.99   | 0.61  | 0.73  | 0.49    | 0.58    | 3.86   | 6.96   | 0  | 7  | 7    | 4.32  | -8.74  | -1.56  | -8.58 | 3.35  | 5.19   | 3.71  | 1.18  | 7.00   | 0.84    | -1.00      | 0.87      | 0.77        |
| 27 | caffeine             | -7.00   | 0.27  | 0.47  | 0.54 | 0.91 | 1.68   | 2.73  | 3.00  | -0.77   | -0.85   | 1.94   | 5.35   | 0  | 6  | 6    | 3.92  | -9.00  | -5.36  | -8.47 | -0.13 | 3.41   | 1.68  | -1.06 | 0.18   | -0.75   | -2.48      | -0.23     | 0.71        |
| 28 | capecitabine         | -1.23   | 0.17  | 0.25  | 0.30 | 0.9  | 0.74   | 1.53  | 1.48  | 1.74    | 1.68    | 3.59   | 12.07  | 3  | 9  | 12   | 4.97  | -9.72  | -13.37 | -8.38 | -0.73 | 5.37   | 3.04  | 0.53  | 1.11   | 0.04    | -2.04      | 0.27      | 0.32        |
| 29 | captopril            | -0.31   | 0.27  | 0.46  | 0.52 | 0.99 | 1.72   | 2.69  | 3.60  | 2.47    | 3.30    | 2.17   | 5.76   | 2  | 3  | 5    | 1.87  | -9.35  | 1.05   | -9.45 | -3.15 | 3.63   | 1.92  | 0.3   | 0.01   | -2.19   | -3.95      | -1.62     | -1.66       |
| 30 | carbamazepine        | 0.31    | 0.29  | 0.35  | 0.38 | 0.83 | 1.81   | 1.24  | 1.11  | 0.45    | 0.40    | 2.36   | 4.63   | 2  | 3  | 5    | 3.25  | -9.05  | -5.19  | -8.53 | 2.67  | 2.85   | 2.19  | 2.1   | 1.50   | 0.18    | -1.49      | 0.30      | -0.15       |
| 31 | carbegoline          | -3.58   | 0.11  | 0.16  | 0.17 | 0.68 | 0.95   | 1.66  | 1.66  | 2.34    | 2.34    | 4.24   | 7.17   | 2  | 7  | 9    | 3.58  | -8.39  | -2.38  | -8.15 | -0.19 | 6.41   | 4.10  | 0.29  | 17.05  | 1.23    | -0.62      | 1.62      | 1.77        |
| 32 | carvedilol           | 0.18    | 0.11  | 0.14  | 0.15 | 0.59 | 0.81   | 0.92  | 0.62  | -0.44   | -0.30   | 4.20   | 7.57   | 3  | 5  | 8    | 3.15  | -8.56  | -2.09  | -8.35 | 3.29  | 5.49   | 3.97  | -2.04 |        |         |            |           |             |
| 33 | cefuroxime           | 0.30    | 0.21  | 0.21  | 0.23 | 0.88 | 0.44   | 1.96  | 1.74  | -0.47   | -0.42   | 4.24   | 19.91  | 12 | 4  | 16   | 2.73  | -8.76  | -13.17 | -7.44 | 2.91  | 4.26   | 3.75  | -2.08 | 1.69   | 0.23    | -2.07      | 0.53      | -0.11       |
| 34 | celecoxib            | 0.18    | 0.15  | 0.20  | 0.25 | 0.75 | 0.96   | 1.02  | 0.77  | 0.97    | 0.74    | 3.81   | 7.80   | 1  | 3  | 4    | 4.09  | -9.93  | -14.21 | -8.51 | 4.21  | 5.10   | 2.97  | 1.02  | 50.01  | 1.70    | -0.19      | 1.71      | 1.69        |
| 35 | celiprolol           | 3.41    | 0.11  | 0.21  | 0.21 | 0.75 | 0.87   | 1.67  | 2.87  | -1.02   | -1.76   | 3.65   | 9.09   | 3  | 5  | 8    | 2.01  | -9.24  | -4.56  | -8.78 | 0.22  | 6.62   | 3.59  | -0.45 | 5.87   | 0.77    | -1.19      | 1.33      | -1.71       |
| 36 | cephalexin           | -0.41   | 0.23  | 0.28  | 0.34 | 0.99 | 3.04   | 6.43  | 7.07  | -0.69   | -0.76   | 3.47   | 3.25   | 3  | 5  | 8    | 5.35  | -9.59  | -6.25  | -8.97 | -2.44 | 4.24   | 2.95  | -1.31 |        |         |            |           |             |
| 37 | cetirizine           | -0.73   | 0.17  | 0.22  | 0.25 | 0.83 | 1.55   | 0.69  | 0.88  | 0.31    | 0.39    | 3.75   | 5.30   | 1  | 5  | 6    | 3.56  | -8.97  | -2.20  | -8.75 | -1.13 | 5.01   | 3.37  | 2.11  | 1.05   | 0.02    | -1.70      | 0.05      | -0.30       |
| 38 | chloramphenikol      | 0.87    | 0.20  | 0.28  | 0.36 | 0.89 | 0.77   | 1.76  | 1.62  | -3.88   | -3.56   | 3.23   | 11.54  | 3  | 7  | 10   | -9.08 | -10.34 | -13.37 | -9.01 | 1.02  | 4.50   | 2.44  | -0.25 | 1.08   | 0.03    | -2.03      | 0.29      | -0.13       |
| 39 | chloroquine          | 0.21    | 0.07  | 0.13  | 0.13 | 0.4  | 1.07   | 0.31  | 0.55  | 0.05    | 0.10    | 3.05   | 2.82   | 1  | 3  | 4    | 4.40  | -8.60  | -5.71  | -8.03 | 1.87  | 5.94   | 3.11  | 3.11  |        |         |            |           |             |
| 40 | chlorpromazine       | 0.15    | 0.16  | 0.15  | 0.19 | 0.49 | 1.57   | 0.47  | 0.56  | 0.11    | 0.13    | 3.19   | 3.18   | 0  | 2  | 2    | 7.13  | -6.83  | 0.74   | -6.90 | 3.26  | 3.04   | 2.62  | 3.77  | 58.85  | 1.77    | 0.27       | 1.82      | 1.19        |
| 41 | chlortalidone        | -1.23   | 0.24  | 0.29  | 0.36 | 0.91 | 0.78   | 1.27  | 1.23  | -1.52   | -1.46   | 3.19   | 11.79  | 4  | 6  | 10   | 4.04  | -9.45  | -7.73  | -8.68 | -0.74 | 3.79   | 2.51  | -0.63 | 1.32   | 0.12    | -1.95      | 0.25      | -0.19       |
| 42 | cimetidine           | -3.52   | 0.30  | 0.35  | 0.39 | 0.88 | 0.76   | 3.94  | 5.12  | -1.14   | -1.47   | 2.52   | 11.42  | 3  | 6  | 9    | 11.01 | -8.75  | -2.76  | -8.48 | -0.25 | 2.94   | 2.29  | -0.59 | 0.26   | -0.58   | -2.64      | 0.19      | 0.98        |
| 43 | ciprofloxacin        | -0.45   | 0.09  | 0.00  | 0.13 | 0.38 | 0.29   | 0.37  | 0.70  | -0.06   | -0.11   | 331.35 | 7.29   | 2  | 6  | 8    | 6.93  | -8.72  | -7.85  | -7.94 | -0.85 | 4.25   | 2.84  | -1.85 | 1.22   | 0.09    | -1.77      | 0.61      | -0.05       |
| 44 | cisapride            | 0.25    | 0.10  | 0.14  | 0.16 | 0.65 | 0.72   | 0.65  | 0.64  | 0.28    | 0.28    | 4.66   | 8.61   | 3  | 7  | 10   | 1.68  | -8.72  | -1.86  | -8.54 | 2.6   | 6.66   | 4.11  | 2.25  | 57.99  | 1.76    | -0.17      | 1.77      | 1.41        |
| 45 | citalopram           | 1.59    | 0.11  | 0.19  | 0.20 | 0.62 | 1.65   | 0.36  | 0.75  | 0.33    | 0.69    | 3.24   | 3.63   | 0  | 3  | 3    | 2.83  | -7.98  | 8.83   | -8.86 | 0.39  | 5.88   | 3.14  | 0.87  |        |         |            |           |             |
| 46 | clarithromycin       | 0.36    |       |       |      | 0.83 | 0.43   | 1.41  | 1.11  | 0.31    | 0.25    |        | 18.29  | 4  | 14 | 18   |       |        |        | 0.00  | 2.33  |        |       | 3.16  | 0.10   | -1.02   | -3.28      | -0.86     | -1.52       |
| 47 | clindamycin          | 0.52    |       |       |      | 0.25 | 0.24   | 0.71  | 0.27  | 0.42    | 0.16    |        | 10.58  | 4  | 7  | 11   |       |        |        | 0.00  | 0.48  |        |       | 1.59  | 11.34  | 1.05    | -0.97      | 1.09      | 0.85        |
| 48 | clobazam             | 0.50    | 0.20  | 0.26  | 0.31 | 0.79 | 1.99   |       |       |         |         |        |        |    |    |      |       |        |        |       |       |        |       |       |        |         |            |           |             |

|     |                        |        |      |      |      |       |      |       |       |       |       |      |       |   |    |    |       |        |        |        |        |      |      |       |       |       |       |       |       |
|-----|------------------------|--------|------|------|------|-------|------|-------|-------|-------|-------|------|-------|---|----|----|-------|--------|--------|--------|--------|------|------|-------|-------|-------|-------|-------|-------|
| 54  | cyproeptadine          | 0.18   | 0.12 | 0.17 | 0.17 | 0.45  | 1.70 | 0.44  | 0.48  | 0.37  | 0.41  | 2.65 | 2.76  | 1 | 3  | 4  | 1.98  | -8.63  | 2.03   | -8.83  | 2.44   | 3.89 | 2.66 | 1.16  | 23.79 | 1.38  | -0.06 | 1.39  | 1.31  |
| 55  | desloratidine          | 0.14   | 0.15 | 0.19 | 0.20 | 0.58  | 2.33 | 0.41  | 0.69  | 5.00  | 8.29  | 3.11 | 2.49  | 1 | 2  | 3  | 3.04  | -9.13  | -2.94  | -8.83  | 4.1    | 3.75 | 2.88 | 0.07  | 50.45 | 1.70  | 0.31  | 1.78  | 2.86  |
| 56  | diazepam               | 0.26   | 0.28 | 0.27 | 0.31 | 0.77  | 2.36 | 0.96  | 0.79  | 0.31  | 0.26  | 2.85 | 3.27  | 0 | 3  | 3  | 3.57  | -9.06  | -1.00  | -8.96  | 2.91   | 2.80 | 2.50 | 3.01  | 5.08  | 0.71  | -0.81 | 0.71  | 0.23  |
| 57  | digoxin                | 0.99   | 0.11 | 0.11 | 0.12 | 0.84  | 0.42 | 3.06  | 3.40  | 0.29  | 0.32  | 7.81 | 20.31 | 6 | 14 | 20 | 5.58  | -8.45  | -11.68 | -7.28  | 0.85   | 7.66 | 7.05 | 2.67  | 3.69  | 0.57  | -1.74 | 1.17  | 0.14  |
| 58  | dihydroergotamine      | 0.38   | 0.15 | 0.16 | 0.18 | 0.78  | 0.66 | 0.81  | 0.84  | -0.36 | -0.37 | 4.78 | 11.82 | 3 | 6  | 9  | 3.90  | -8.60  | -1.05  | -8.50  | 2.05   | 5.13 | 4.33 | -2.11 |       |       |       |       |       |
| 59  | diltiazem              | 0.36   | 0.12 | 0.18 | 0.19 | 0.76  | 1.22 | 0.65  | 0.96  | -0.44 | -0.65 | 4.29 | 5.91  | 0 | 4  | 4  | 2.43  | -8.71  | -1.86  | -8.52  | 2.1    | 6.17 | 3.96 | -1.11 |       |       |       |       |       |
| 60  | diphenhydramin         | 0.25   | 0.12 | 0.23 | 0.22 | 0.58  | 4.33 | 0.33  | 0.55  | 0.16  | 0.26  | 2.55 | 1.25  | 0 | 2  | 2  | 0.52  | -9.18  | 2.36   | -9.41  | 2.29   | 4.92 | 2.65 | 2.09  | 3.66  | 0.56  | -0.53 | 0.57  | 0.24  |
| 61  | doxazosin              | 1.25   | 0.15 | 0.18 | 0.22 | 0.75  | 0.59 | 0.83  | 0.74  | 0.38  | 0.34  | 4.09 | 12.27 | 1 | 9  | 10 | 4.02  | -8.67  | -11.34 | -7.54  | 0.6    | 4.93 | 3.46 | 2.14  | 0.22  | -0.66 | -2.75 | -0.65 | -0.99 |
| 62  | doxepin                | 0.28   | 0.12 | 0.21 | 0.21 | 0.58  | 4.33 | 0.41  | 0.72  | 0.32  | 0.55  | 2.79 | 1.25  | 0 | 2  | 2  | 0.31  | -9.11  | -0.81  | -9.03  | 2.08   | 4.69 | 2.81 | 0.98  |       |       |       |       |       |
| 63  | doxycycline            | -0.02  | 0.02 | 0.02 | 0.02 | 0.08  | 0.05 | 0.05  | 0.10  | -0.02 | -0.05 | 4.44 | 18.16 | 7 | 10 | 17 | 11.15 | -9.00  | -11.51 | -7.85  | -3.32  | 4.43 | 3.68 | -1.86 | 1.76  | 0.24  | -2.01 | 0.29  | -0.13 |
| 64  | drotaverine            | 0.09   | 0.09 | 0.14 | 0.14 | 0.55  | 1.18 | 0.67  | 0.66  | -0.39 | -0.38 | 3.98 | 4.90  | 1 | 5  | 6  | 3.56  | -8.36  | -3.63  | -7.99  | 6.12   | 6.39 | 3.89 | -1.51 | 31.24 | 1.49  | -0.20 | 1.55  | -0.99 |
| 65  | duloxetine             | 0.46   | 0.13 | 0.19 | 0.20 | 0.57  | 2.49 | 0.37  | 0.59  | 8.25  | 13.25 | 2.97 | 2.13  | 1 | 2  | 3  | 0.96  | -9.01  | -3.82  | -8.63  | 1.24   | 4.56 | 2.84 | 0.04  |       |       |       |       |       |
| 66  | eletriptan             | 1.72   | 0.13 | 0.16 | 0.17 | 0.62  | 1.17 | 0.33  | 0.73  | -0.80 | -1.77 | 3.82 | 5.32  | 1 | 3  | 4  | 4.88  | -8.50  | -5.96  | -7.90  | 0.36   | 4.69 | 3.57 | -0.35 |       |       |       |       |       |
| 67  | enalapril              | -0.26  | 0.14 | 0.16 | 0.17 | 0.6   | 0.60 | 0.59  | 1.05  | 0.14  | 0.25  | 3.75 | 9.59  | 2 | 7  | 9  | 3.46  | -9.37  | 0.20   | -9.38  | -2.35  | 4.19 | 3.48 | 2.3   | 0.05  | -1.29 | -3.27 | -1.03 | -1.65 |
| 68  | eplerenone             | 0.80   | 0.19 | 0.20 | 0.23 | 0.84  | 1.08 | 1.88  | 1.70  | 0.48  | 0.43  | 4.15 | 7.89  | 0 | 6  | 6  | 3.20  | -10.28 | -2.81  | -10.00 | 1.05   | 4.43 | 3.73 | 1.96  | 1.54  | 0.19  | -1.71 | 0.49  | -0.10 |
| 69  | escitalopram           | 1.41   | 0.10 | 0.17 | 0.18 | 0.55  | 1.43 | 0.75  | 0.93  | 0.48  | 0.60  | 3.24 | 3.63  | 0 | 3  | 3  | 2.57  | -9.21  | -8.44  | -8.37  | 0.39   | 5.46 | 3.08 | 0.87  | 32.08 | 1.51  | -0.05 | 1.76  | 1.57  |
| 70  | estradiol benzoate     | 0.25   | 0.13 | 0.17 | 0.18 | 0.63  | 1.03 | 1.03  | 0.65  | 0.23  | 0.15  | 3.73 | 6.04  | 0 | 4  | 4  | 5.95  | -10.11 | -1.40  | -9.97  | 2.51   | 4.77 | 3.58 | 4.2   | 6.92  | 0.84  | -0.94 | 0.86  | 0.22  |
| 71  | estrone                | 0.31   | 0.17 | 0.20 | 0.22 | 0.79  | 0.79 | 1.04  | 0.81  | 0.35  | 0.27  | 4.02 | 9.77  | 1 | 6  | 7  | 5.76  | -10.17 | -2.21  | -9.95  | 2.53   | 4.73 | 3.67 | 2.86  | 29.40 | 1.47  | -0.52 | 1.49  | 1.01  |
| 72  | ethambutol             | -0.44  | 0.20 | 0.48 | 0.44 | 0.97  | 1.47 | 0.84  | 3.80  | 0.72  | 3.28  | 2.04 | 6.45  | 4 | 4  | 8  | 1.11  | -9.11  | 23.39  | -11.45 | -2.21  | 4.95 | 2.18 | 0.29  |       |       |       |       |       |
| 73  | ethanol                |        |      |      |      |       |      |       |       |       |       | 4.61 | 2.02  | 1 | 1  | 2  |       |        |        |        | -0.19  |      |      |       |       |       |       |       |       |
| 74  | famotidine             | -0.96  | 0.20 | 0.29 | 0.36 | 0.98  | 0.42 | 4.06  | 5.66  | -0.64 | -0.89 | 3.36 | 23.78 | 8 | 9  | 17 | 1.01  | -8.55  | -5.85  | -7.97  | -1.02  | 4.85 | 2.69 | -1.11 | 0.26  | -0.58 | -2.96 | 0.17  | 0.53  |
| 75  | fexofenadine           | 0.37   | 0.14 | 0.17 | 0.17 | 0.85  | 1.06 | 0.92  | 1.32  | 0.16  | 0.23  | 5.02 | 8.10  | 3 | 5  | 8  | 2.61  | -8.98  | -2.28  | -8.75  | 2.3    | 6.27 | 4.87 | 3.81  | 1.08  | 0.03  | -1.87 | 0.22  | -0.55 |
| 76  | fluconazole            | 1.80   | 0.26 | 0.29 | 0.36 | 0.9   | 1.24 | 7.57  | 7.74  | 1.04  | 1.06  | 3.06 | 7.18  | 1 | 7  | 8  | 0.52  | -10.28 | -0.83  | -10.19 | 0.5    | 3.44 | 2.49 | 0.84  | 0.43  | -0.37 | -2.22 |       | -0.29 |
| 77  | fluoxetine             | 0.35   | 0.11 | 0.17 | 0.20 | 0.54  | 3.43 | 0.71  | 0.77  | 0.35  | 0.38  | 3.09 | 2.13  | 1 | 2  | 3  | 4.43  | -9.41  | -3.95  | -9.02  | 1.56   | 4.99 | 2.71 | 1.93  | 66.64 | 1.82  | 0.50  | 1.85  | 1.54  |
| 78  | flupenthixol           | 0.15   | 0.11 | 0.15 | 0.18 | 0.66  | 1.27 | 0.55  | 0.69  | 0.10  | 0.12  | 4.30 | 5.20  | 1 | 3  | 4  | 4.80  | -7.61  | -8.51  | -6.76  | 4.42   | 5.85 | 3.65 | 5.33  | 51.21 | 1.71  | -0.01 | 1.73  | 0.98  |
| 79  | fluvoxamine            | 0.54   | 0.11 | 0.19 | 0.22 | 0.62  | 1.09 | 0.41  | 0.79  | 0.12  | 0.23  | 3.18 | 5.68  | 1 | 4  | 5  | 3.90  | -9.69  | -8.25  | -8.87  | 1.15   | 5.89 | 2.79 | 2.69  |       |       |       |       |       |
| 80  | furosemide             | -8.00  | 0.23 | 0.31 | 0.40 | 0.96  | 0.73 | 0.97  | 1.01  | -3.83 | -4.00 | 3.11 | 13.10 | 4 | 7  | 11 | 3.27  | -8.92  | -10.23 | -7.90  | -0.12  | 4.19 | 2.42 | -0.24 | 0.28  | -0.56 | -2.67 | -0.53 | 2.32  |
| 81  | gabapentin             | -0.50  | 0.28 | 0.39 | 0.39 | 0.66  | 1.04 | 30.33 | 22.00 | 0.95  | 0.69  | 1.71 | 6.33  | 2 | 3  | 5  | 1.56  | -9.35  | 8.36   | -10.19 | -1.31  | 2.38 | 1.70 | 0.96  |       |       |       |       |       |
| 82  | gentamycin             | -0.12  | 0.19 | 0.19 | 0.21 | 0.911 | 0.45 | 6.27  | 6.00  | -0.27 | -0.26 | 4.77 | 19.97 | 8 | 12 | 20 | 4.31  | -9.34  | 18.62  | -11.20 | -7.81  | 4.71 | 4.25 | -3.46 |       |       |       |       |       |
| 83  | gliclazide             | -2.96  | 0.17 | 0.26 | 0.29 | 0.83  | 0.92 | 1.01  | 0.85  | 0.50  | 0.42  | 3.23 | 8.69  | 2 | 6  | 8  | 5.31  | -9.38  | -10.80 | -8.30  | -0.28  | 4.91 | 2.86 | 1.9   | 0.28  | -0.55 | -2.49 | -0.53 | -0.83 |
| 84  | haloperidol            | 0.29   | 0.12 | 0.16 | 0.18 | 0.61  | 1.58 | 0.70  | 0.70  | 0.49  | 0.49  | 3.76 | 4.05  | 1 | 3  | 4  | 2.85  | -9.22  | -4.64  | -8.75  | 2.11   | 5.29 | 3.37 | 1.31  | 23.74 | 1.38  | -0.23 | 1.41  | 1.26  |
| 85  | hydrochlorotiazide     | -10.66 | 0.25 | 0.33 | 0.48 | 0.97  | 0.81 | 1.41  | 1.41  | -0.30 | -0.30 | 2.97 | 11.84 | 3 | 5  | 8  | 7.27  | -9.64  | -11.83 | -8.46  | -0.091 | 3.85 | 2.01 | -3.24 |       |       |       |       |       |
| 86  | hydrocortisone acetate | 0.18   | 0.17 | 0.22 | 0.23 | 0.82  | 1.36 | 1.01  | 0.86  | 0.23  | 0.20  | 3.73 | 6.04  | 0 | 4  | 4  | 4.23  | -10.14 | -0.86  | -10.06 | 4.53   | 4.77 | 3.58 | 4.2   | 2.82  | 0.45  | -1.33 | 0.47  | -0.17 |
| 87  | hydroxyzine            | 0.31   | 0.11 | 0.17 | 0.18 | 0.62  | 1.64 | 0.59  | 0.63  | 0.45  | 0.48  | 3.75 | 3.59  | 1 | 4  | 5  | 1.27  | -8.81  | -0.65  | -8.75  | 2      | 5.48 | 3.54 | 1.23  | 13.82 | 1.14  | -0.41 | 1.17  | 1.05  |
| 88  | ibuprofen              | 1.04   | 0.33 | 0.40 | 0.34 | 0.83  | 2.17 | 0.94  | 0.85  | 0.23  | 0.21  | 2.06 | 3.73  | 1 | 2  | 3  | 1.91  | -9.39  | 1.92   | -9.58  | 0.8    | 2.52 | 2.42 | 3.83  | 0.86  | -0.07 | -1.64 | -0.04 | -0.65 |
| 89  | indomethacin           | -5.50  | 0.18 | 0.25 | 0.29 | 0.88  | 1.37 | 0.93  | 0.90  | -0.63 | -0.61 | 3.58 | 6.36  | 1 | 5  | 6  | 2.98  | -8.69  | -5.75  | -8.12  | -0.16  | 4.94 | 3.05 | -1.43 | 1.08  | 0.03  | -1.77 | 0.05  | -0.02 |
| 90  | ipratropium            | -0.25  | 0.10 | 0.15 | 0.15 | 0.54  | 1.16 | 9.56  | 12.00 | 0.18  | 0.22  | 3.49 | 4.65  | 1 | 2  | 3  | 10.92 | -12.36 | -39.78 | -8.39  | -2.2   | 5.15 | 3.55 | 2.44  | 2.97  | 0.47  | -1.19 |       | 0.09  |
| 91  | isosorbide             | -1.06  | 0.19 | 0.28 | 0.38 | 0.54  | 0.59 | 4.60  | 11.00 | -0.11 | -0.25 | 1.91 | 9.37  | 1 | 6  | 7  | 2.81  | -11.01 | -1.93  | -10.82 | -0.51  | 2.88 | 1.43 | -2.19 | 0.21  | -0.68 | -2.65 |       |       |
| 92  | itraconazole           | 0.20   | 0.10 | 0.12 | 0.14 | 0.86  | 0.83 | 0.97  | 0.84  | 0.11  | 0.10  | 7.06 | 10.08 | 0 | 9  | 9  | 6.11  | -8.42  | -7.70  | -7.65  | 4.26   | 8.43 | 6.15 | 8.68  |       |       |       |       |       |
| 93  | ketoprofen             | -3.64  | 0.22 | 0.36 | 0.39 | 0.91  | 1.58 | 0.90  | 0.87  | 0.35  | 0.34  | 2.54 | 5.44  | 1 | 3  | 4  | 4.50  | -9.96  | -3.99  | -9.56  | -0.25  | 4.07 | 2.36 | 2.56  | 0.20  | -0.71 | -2.44 | -0.70 | -1.12 |
| 94  | ketorolac              | -1.01  | 0.25 | 0.37 | 0.40 | 0.96  | 1.62 | 0.92  | 0.97  | 0.51  | 0.54  | 2.59 | 5.93  | 1 | 3  | 4  | 2.14  | -9.19  | -3.63  | -8.83  | -0.95  | 3.87 | 2.39 | 1.79  |       |       |       |       |       |
| 95  | ketotifen              | 0.23   | 0.19 | 0.24 | 0.26 | 0.75  | 1.52 | 0.48  | 0.99  | 1.38  | 2.85  | 3.09 | 4.86  | 0 | 2  | 2  | 4.07  | -9.08  | -10.10 | -8.07  | 3.28   | 3.89 | 2.87 | 0.26  | 22.04 | 1.34  | -0.34 | 1.47  | 1.93  |
| 96  | lamotrigine            | -4.58  | 0.28 | 0.34 | 0.45 | 0.87  | 0.95 | 1.63  | 1.56  | 0.65  | 0.62  | 2.56 | 9.07  | 4 | 5  | 9  | 2.75  | -8.22  | -5.61  | -7.66  | -0.19  | 3.15 | 1.93 | 1.38  | 0.71  | -0.15 | -2.10 | 0.11  | -0.29 |
| 97  | levetiracetam          | -1.37  | 0.30 | 0.54 | 0.57 | 0.92  | 1.45 | 9.20  | 9.20  | -1.30 | -1.30 | 1.70 | 6.34  | 1 | 2  | 3  | 5.71  | -9.80  | 6.49   | -10.45 | -0.67  | 3.09 | 1.62 | -0.71 |       |       |       |       |       |
| 98  | levocetizine           | -0.73  | 0.15 | 0.21 | 0.23 | 0.83  | 1.57 | 0.70  | 0.91  | 0.18  | 0.24  | 3.89 | 5.30  | 1 | 5  | 6  | 1.73  | -9.00  | -1.67  | -8.83  | -1.13  | 5.59 | 3.55 | 3.48  | 3.82  | 0.58  | -1.14 | 0.62  | 0.04  |
| 99  | levofloxacin           | 0.42   | 0.06 | 0.07 | 0.09 | 0.27  | 0.41 | 0.53  | 0.97  | 0.27  | 0.48  | 3.61 | 7.33  | 1 | 7  | 8  | 7.21  | -8.72  | -8.37  | -7.88  | 0.65   | 4.75 | 3.06 | 0.62  | 0.90  | -0.04 | -1.91 | 0.46  | 0.16  |
| 100 | lincomycin             | -1.96  | 0.15 | 0.23 | 0.24 | 0.94  | 0.75 | 1.30  | 1.34  | 1.90  | 1.96  | 4.07 | 12.60 | 5 | 8  | 13 | 3.92  | -8.50  | 0.04   | -8.50  | -0.48  | 6.35 | 3.89 | 0.48  |       |       |       |       |       |
| 101 | loperamide             | 0.21   | 0.15 | 0.16 | 0.17 | 0.75  | 1.76 | 0.69  | 0.79  | 0.13  | 0.15  | 4.77 | 4.38  | 1 | 4  | 5  | 4.65  | -8.52  | -0.23  | -8.50  | 3.53   | 4.89 | 4.33 | 5.01  |       |       |       |       |       |
| 102 | loratadine             | 0.11   | 0.14 | 0.18 | 0.21 | 0.68  | 1.60 | 0.96  | 0.69  | 3.13  | 2.27  | 3.69 | 4.24  | 0 | 4  | 4  | 2.90  | -9.02  | -6.59  | -8.36  | 5.94   | 4.93 | 3.3  |       |       |       |       |       |       |

|     |                  |        |      |      |      |      |      |      |      |       |       |      |       |   |    |    |       |        |        |        |       |      |      |       |        |       |       |       |       |
|-----|------------------|--------|------|------|------|------|------|------|------|-------|-------|------|-------|---|----|----|-------|--------|--------|--------|-------|------|------|-------|--------|-------|-------|-------|-------|
| 109 | methyldopa       | -0.36  | 0.25 | 0.40 | 0.46 | 0.85 | 0.83 | 1.83 | 4.30 | -0.25 | -0.59 | 2.11 | 10.38 | 5 | 5  | 10 | 1.56  | -9.07  | 2.75   | -9.34  | -2.38 | 3.34 | 1.85 | -1.46 | 0.10   | -1.02 | -3.03 | -0.32 | 0.70  |
| 110 | metoclopramide   | 32.50  | 0.12 | 0.22 | 0.23 | 0.65 | 0.95 |      |      | 0.23  | 0.50  | 3.00 | 6.76  | 3 | 5  | 8  | 3.80  | -8.88  | -2.89  | -8.59  | 0.02  | 5.41 | 2.80 | 1.27  | 6.16   | 0.79  | -1.04 |       | 0.69  |
| 111 | metoprolol       | 8.24   | 0.04 | 0.09 | 0.09 | 0.28 | 0.49 | 4.00 | 2.08 | 0.31  | 0.16  | 3.09 | 5.07  | 2 | 4  | 6  | 1.53  | -9.16  | 2.69   | -9.43  | 0.034 | 7.00 | 3.22 | 1.57  | 4.32   | 0.64  | -1.07 |       | 0.44  |
| 112 | mianserin        | 0.20   | 0.15 | 0.21 | 0.21 | 0.55 | 8.49 | 0.61 | 0.61 | 0.58  | 0.59  | 2.64 | 0.65  | 0 | 2  | 2  | 0.56  | -8.66  | 2.68   | -8.93  | 2.76  | 3.65 | 2.64 | 0.94  | 21.72  | 1.34  | 0.52  | 1.38  | 1.36  |
| 113 | midazolam        | 0.17   | 0.22 | 0.20 | 0.24 | 0.66 | 2.61 | 0.85 | 0.68 | 0.24  | 0.19  | 3.26 | 2.53  | 0 | 3  | 3  | 3.03  | -9.24  | -1.28  | -9.11  | 3.92  | 3.04 | 2.76 | 3.41  | 5.69   | 0.76  | -0.65 | 0.77  | 0.22  |
| 114 | minoxidil        | 1.23   | 0.25 | 0.38 | 0.41 | 0.8  | 0.88 |      |      | 0.43  | 0.85  | 2.08 | 9.36  | 2 | 5  | 7  | 4.20  | -8.07  | 0.29   | -8.10  | 0.65  | 3.16 | 1.96 | 0.97  |        |       |       |       |       |
| 115 | mirtazapine      | 0.29   | 0.16 | 0.22 | 0.22 | 0.58 | 2.99 | 0.45 | 0.68 | 0.33  | 0.50  | 2.65 | 1.94  | 0 | 3  | 3  | 1.76  | -8.79  | 0.19   | -8.81  | 1.97  | 3.57 | 2.60 | 1.16  | 5.83   | 0.77  | -0.52 | 0.84  | 0.70  |
| 116 | montelukast      | 0.13   | 0.10 | 0.12 | 0.13 | 0.7  | 0.98 | 0.96 | 0.70 | 0.23  | 0.17  | 5.88 | 7.04  | 2 | 4  | 6  | 3.34  | -7.46  | -6.36  | -6.83  | 5.19  | 7.27 | 5.47 | 4.13  | 99.10  | 2.00  | 0.15  | 2.00  | 1.38  |
| 117 | naproxen         | 1.87   | 0.23 | 0.38 | 0.41 | 0.88 | 1.87 | 0.90 | 0.88 | 0.30  | 0.29  | 2.30 | 4.65  | 1 | 3  | 4  | 1.92  | -9.10  | -2.79  | -8.82  | 0.47  | 3.89 | 2.15 | 2.99  | 0.31   | -0.51 | -2.18 | -0.51 | -0.99 |
| 118 | nebivolol        | 0.17   | 0.08 | 0.10 | 0.11 | 0.4  | 0.56 | 0.77 | 0.41 | -0.73 | -0.39 | 4.05 | 7.10  | 3 | 5  | 8  | 2.46  | -9.05  | -1.07  | -8.94  | 2.4   | 5.05 | 3.53 | -1.03 |        |       |       |       |       |
| 119 | nitrendipine     | 0.25   | 0.16 | 0.25 | 0.29 | 0.86 | 0.78 | 0.98 | 0.87 | -1.15 | -1.02 | 3.46 | 11.05 | 1 | 5  | 6  | 6.92  | -9.09  | -10.94 | -8.00  | 3.5   | 5.30 | 2.98 | -0.84 |        |       |       |       |       |
| 120 | ofloxacin        | -0.83  | 0.11 | 0.15 | 0.18 | 0.54 | 0.68 | 0.72 | 1.56 | -0.09 | -0.19 | 3.61 | 7.33  | 1 | 7  | 8  | 4.68  | -8.72  | -8.97  | -7.82  | -0.65 | 4.74 | 3.07 | -2.61 |        |       |       |       |       |
| 121 | olanzapine       | -0.36  | 0.09 | 0.16 | 0.18 | 0.53 | 0.59 | 1.63 | 2.86 | -0.18 | -0.32 | 3.28 | 8.41  | 1 | 6  | 7  | 7.55  | -9.20  | -7.85  | -8.41  | -1.48 | 6.19 | 3.01 | -1.56 | 20.31  | 1.31  | -0.62 | 2.06  | -0.84 |
| 122 | oxazepam         | 0.36   | 0.31 | 0.29 | 0.31 | 0.83 | 1.36 | 1.10 | 0.99 | 0.32  | 0.29  | 2.87 | 6.17  | 2 | 4  | 6  | 3.38  | -9.09  | -1.06  | -8.98  | 2.32  | 2.72 | 2.72 | 2.91  | 4.78   | 0.68  | -1.11 | 0.75  | 0.22  |
| 123 | oxcarbamazepine  | 0.73   | 0.30 | 0.36 | 0.40 | 0.91 | 1.44 | 2.25 | 2.28 | -2.20 | -2.22 | 2.52 | 6.34  | 1 | 2  | 3  | 3.46  | -9.31  | -4.73  | -8.84  | 1.25  | 3.02 | 2.26 | -0.41 |        |       |       |       |       |
| 124 | oxybutinin       | 0.05   | 0.05 | 0.08 | 0.08 | 0.29 | 0.48 | 0.72 | 0.26 | 0.20  | 0.07  | 3.57 | 4.98  | 1 | 3  | 4  | 1.02  | -9.18  | -0.66  | -9.11  | 5.53  | 5.82 | 3.61 | 3.24  | 49.68  | 1.70  | 0.00  | 1.73  | 1.19  |
| 125 | PABA             | -0.58  | 0.37 | 0.68 | 0.76 | 0.93 | 1.47 |      |      | -1.21 | -1.26 | 1.37 | 6.33  | 3 | 3  | 6  | 4.29  | -8.50  | -2.10  | -8.29  | -1.61 | 2.54 | 1.22 | -0.74 | 0.01   | -1.88 | -3.69 |       | 2.55  |
| 126 | pantoprazole     | 0.57   | 0.17 | 0.22 | 0.28 | 0.85 | 0.96 | 0.94 | 0.85 | -0.49 | -0.44 | 3.83 | 8.63  | 1 | 6  | 7  | 7.25  | -9.09  | -9.03  | -8.19  | 1.5   | 5.08 | 3.01 | -1.89 | 2.19   | 0.34  | -1.60 | 0.35  | -0.18 |
| 127 | paracetamol      | 2.71   | 0.30 | 0.61 | 0.66 | 0.92 | 1.86 | 3.74 | 3.68 | -0.71 | -0.70 | 1.51 | 4.93  | 2 | 3  | 5  | 3.28  | -8.58  | 0.73   | -8.65  | 0.34  | 3.03 | 1.39 | -1.32 | 0.32   | -0.49 | -2.19 | 0.11  | 0.37  |
| 128 | paroxetine       | 0.50   | 0.15 | 0.18 | 0.20 | 0.6  | 1.69 | 0.60 | 0.71 | -1.14 | -1.37 | 3.31 | 3.97  | 1 | 4  | 5  | 2.12  | -9.00  | 0.34   | -9.04  | 1.19  | 4.12 | 2.99 | -0.49 | 115.77 | 2.06  | 0.46  | 2.09  | -4.21 |
| 129 | pefloxacin       | 1.46   | 0.16 | 0.23 | 0.26 | 0.76 | 1.09 | 1.16 | 2.80 | -0.19 | -0.45 | 3.33 | 6.41  | 1 | 6  | 7  | 9.41  | -9.01  | -10.45 | -7.97  | 0.52  | 4.66 | 2.91 | -1.54 |        |       |       |       |       |
| 130 | pergolide        | 0.24   | 0.12 | 0.18 | 0.18 | 0.55 | 1.20 | 0.52 | 0.59 | 0.21  | 0.23  | 3.14 | 4.43  | 1 | 2  | 3  | 1.93  | -8.35  | 1.51   | -8.50  | 2.29  | 4.50 | 3.09 | 2.29  | 0.00   |       |       |       |       |
| 131 | perindopril      | -57.00 | 0.10 | 0.15 | 0.16 | 0.57 | 0.60 | 3.03 | 3.87 | 0.22  | 0.28  | 3.68 | 9.59  | 2 | 7  | 9  | 6.26  | -9.78  | 2.88   | -10.07 | -0.01 | 5.43 | 3.52 | 2.06  | 0.18   | -0.76 | -2.74 | 0.07  | -1.07 |
| 132 | phenytoin        | 0.35   | 0.26 | 0.34 | 0.39 | 0.87 | 1.48 | 1.08 | 0.96 | 1.33  | 1.18  | 2.52 | 5.82  | 2 | 4  | 6  | 2.98  | -9.84  | -2.94  | -9.55  | 2.48  | 3.32 | 2.26 | 0.73  | 1.78   | 0.25  | -1.52 | 0.30  | 0.39  |
| 133 | pindolol         | 4.00   | 0.17 | 0.31 | 0.31 | 0.76 | 1.36 | 1.30 | 1.95 | -0.42 | -0.63 | 2.48 | 5.73  | 3 | 3  | 6  | 3.19  | -8.47  | 0.63   | -8.53  | 0.19  | 4.60 | 2.44 | -1.23 | 6.09   | 0.78  | -0.97 | 1.18  | -0.64 |
| 134 | piroxicam        | -0.27  | 0.22 | 0.17 | 0.23 | 0.58 | 0.56 | 0.99 | 0.61 | 0.92  | 0.56  | 3.33 | 10.80 | 2 | 7  | 9  | 11.24 | -8.63  | 2.05   | -8.84  | -2.14 | 2.66 | 2.50 | 1.07  | 0.16   | -0.79 | -2.82 | -0.78 | -0.82 |
| 135 | prednisolone     | 0.58   | 0.22 | 0.25 | 0.28 | 0.87 | 0.93 | 1.04 | 0.98 | 0.47  | 0.44  | 3.46 | 9.48  | 3 | 5  | 8  | 3.68  | -10.01 | -4.70  | -9.54  | 1.49  | 3.96 | 3.14 | 2.01  | 2.84   | 0.45  | -1.52 | 0.50  | 0.15  |
| 136 | pregabalin       | -0.30  | 0.12 | 0.26 | 0.25 | 0.41 | 0.65 |      |      | 0.85  | 0.46  | 1.59 | 6.33  | 2 | 3  | 5  | 1.67  | -9.53  | 9.29   | -10.46 | -1.38 | 3.54 | 1.65 | 0.89  |        |       |       |       |       |
| 137 | primidone        | 2.33   | 0.29 | 0.43 | 0.46 | 0.93 | 1.67 | 1.33 | 1.39 | 1.29  | 1.35  | 2.18 | 5.82  | 2 | 2  | 4  | 2.84  | -9.78  | -0.15  | -9.77  | 0.4   | 3.19 | 2.02 | 0.72  |        |       |       |       |       |
| 138 | progesterone     | 0.11   | 0.16 | 0.19 | 0.20 | 0.71 | 1.46 | 0.98 | 0.70 | 0.31  | 0.22  | 3.77 | 4.65  | 1 | 3  | 4  | 5.88  | -9.29  | -2.60  | -9.03  | 6.24  | 4.54 | 3.60 | 3.12  | 34.99  | 1.54  | -0.12 | 1.55  | 1.05  |
| 139 | promazine        | 0.19   | 0.17 | 0.18 | 0.20 | 0.51 | 1.60 | 0.39 | 0.54 | 0.11  | 0.16  | 2.84 | 3.18  | 0 | 2  | 2  | 2.86  | -7.54  | -3.93  | -7.15  | 2.67  | 2.93 | 2.53 | 3.25  | 0.10   | -1.02 | -2.52 | -0.99 | -1.53 |
| 140 | promethazine     | 0.15   | 0.11 | 0.17 | 0.18 | 0.49 | 1.48 | 0.45 | 0.51 | -2.10 | -2.35 | 2.84 | 3.18  | 0 | 2  | 2  | 3.40  | -7.83  | -0.65  | -7.76  | 3.2   | 4.36 | 2.76 | -0.2  | 14.96  | 1.17  | -0.33 | 1.21  | -5.87 |
| 141 | propafenone      | 0.27   | 0.10 | 0.17 | 0.17 | 0.56 | 1.04 | 0.61 | 0.63 | 0.32  | 0.33  | 3.29 | 5.86  | 2 | 4  | 6  | 2.97  | -8.77  | -1.75  | -8.59  | 2.06  | 5.36 | 3.28 | 1.86  | 66.74  | 1.82  | 0.06  | 1.84  | 1.55  |
| 142 | propranolol      | 0.50   | 0.21 | 0.25 | 0.25 | 0.64 | 1.52 | 0.56 | 0.70 | 0.18  | 0.23  | 2.59 | 4.15  | 2 | 3  | 5  | 1.53  | -8.36  | -5.71  | -7.79  | 1.27  | 3.09 | 2.56 | 2.8   | 28.09  | 1.45  | -0.17 | 1.49  | 1.00  |
| 143 | propylthiouracil | 0.79   | 0.28 | 0.55 | 0.62 | 0.93 | 2.26 | 1.15 | 1.13 | 1.32  | 1.31  | 1.70 | 4.11  | 2 | 1  | 3  | 5.57  | -9.20  | -12.71 | -7.93  | 1.18  | 3.32 | 1.51 | 0.71  |        |       |       |       |       |
| 144 | pseudoephedrine  | -0.60  | 0.16 | 0.33 | 0.32 | 0.54 | 1.74 | 890  | 560  | 1.05  | 0.66  | 1.65 | 3.23  | 2 | 2  | 4  | 2.62  | -9.25  | 5.04   | -9.75  | -0.9  | 3.30 | 1.71 | 0.85  | 2.21   | 0.34  | -1.16 |       | 0.42  |
| 145 | quetiapine       | 0.47   | 0.13 | 0.19 | 0.21 | 0.73 | 0.94 | 0.82 | 0.83 | 0.24  | 0.24  | 3.84 | 7.36  | 1 | 5  | 6  | 1.57  | -8.68  | -7.24  | -7.95  | 1.55  | 5.42 | 3.55 | 2.84  | 17.02  | 1.23  | -0.64 | 1.31  | 0.78  |
| 146 | quinapril        | 0.67   | 0.09 | 0.13 | 0.14 | 0.57 | 0.58 | 0.45 | 0.58 | 0.26  | 0.33  | 4.39 | 9.59  | 2 | 5  | 7  | 5.13  | -9.50  | 0.91   | -9.59  | 0.85  | 6.10 | 4.10 | 1.69  | 1.22   | 0.09  | -1.89 | 0.10  | -0.14 |
| 147 | quinine          | 0.42   | 0.16 | 0.21 | 0.22 | 0.66 | 1.40 | 0.41 | 0.91 | 0.24  | 0.53  | 3.14 | 4.56  | 1 | 4  | 5  | 1.73  | -9.55  | -0.14  | -9.54  | 1.58  | 4.22 | 3.06 | 1.2   |        |       |       |       |       |
| 148 | ranitidine       | 4.26   | 0.13 | 0.26 | 0.28 | 0.81 | 0.72 | 1.60 | 5.33 | -0.20 | -0.68 | 3.14 | 11.16 | 2 | 7  | 9  | 8.02  | -9.24  | -7.19  | -8.52  | 0.19  | 6.30 | 2.89 | -1.18 | 0.67   | -0.17 | -2.22 |       | 0.15  |
| 149 | rifampicin       | -2.07  |      | 0.12 |      | 0.95 | 0.43 | 0.87 | 1.06 |       |       | 8.23 | 22.02 | 6 | 14 | 20 |       |        |        |        | -0.46 |      |      |       |        |       |       |       |       |
| 150 | rimantadine      | 11.73  | 0.39 | 0.53 | 0.50 | 0.95 | 3.65 | 2.30 | 2.38 | 0.42  | 0.43  | 1.79 | 2.60  | 1 | 1  | 2  | 1.22  | -9.33  | 29.54  | -12.28 | 0.081 | 2.43 | 1.91 | 2.19  |        |       |       |       |       |
| 151 | risperidone      | 0.27   | 0.13 | 0.15 | 0.17 | 0.62 | 0.94 | 0.32 | 0.66 | 0.45  | 0.92  | 4.10 | 6.19  | 0 | 6  | 6  | 3.42  | -8.93  | -8.76  | -8.06  | 2.27  | 4.91 | 3.73 | 0.63  | 4.83   | 0.68  | -1.11 | 0.74  | 0.88  |
| 152 | rizatriptan      | 0.27   | 0.17 | 0.23 | 0.25 | 0.72 | 1.30 | 1.39 | 5.50 | -0.72 | -2.85 | 3.12 | 5.91  | 1 | 4  | 5  | 1.76  | -8.14  | -6.90  | -7.45  | 2.68  | 4.26 | 2.90 | -0.27 | 2.53   | 0.40  | -1.37 | 1.26  | -1.49 |
| 153 | rosuvastatin     | -0.35  | 0.13 | 0.19 | 0.22 | 0.92 | 0.62 | 1.01 | 1.00 | 0.75  | 0.75  | 4.82 | 14.09 | 3 | 8  | 11 | 5.66  | -9.19  | -10.63 | -8.13  | -2.63 | 6.89 | 4.12 | 1.18  | 0.96   | -0.02 | -2.17 | 0.04  | -0.09 |
| 154 | roxitromicin     | 0.28   |      |      |      | 0.8  | 0.36 | 0.96 | 0.82 | 0.32  | 0.27  |      | 21.69 | 5 | 16 | 21 |       |        |        | 0.00   | 2.9   |      |      | 2.9   |        |       |       |       |       |
| 155 | rupatadine       | 0.09   | 0.11 | 0.13 | 0.14 | 0.55 | 1.79 | 0.44 | 0.53 | 0.26  | 0.32  | 4.15 | 2.90  | 0 | 3  | 3  | 1.61  | -8.99  | -6.43  | -8.35  | 5.97  | 4.97 | 3.94 | 1.63  | 9.29   | 0.97  | -0.49 | 0.97  | 0.76  |
| 156 | sertraline       | 0.18   | 0.12 | 0.16 | 0.18 | 0.49 | 3.99 | 0.54 | 0.49 | 0.32  | 0.29  | 3.06 | 1.20  | 1 | 1  | 2  | 2.87  | -9.19  | -0.94  | -9.09  | 2.77  | 4.21 | 2.72 | 1.68  | 42.89  | 1.63  | 0.55  | 1.64  | 1.41  |
| 157 | sildenafil       | 0.34   | 0.12 | 0.16 | 0.18 | 0.77 | 0.70 | 0.70 | 0.79 | -0.46 | -0.52 | 4.75 | 10.91 | 1 | 8  | 9  | 5.84  | -8.91  | 9.47   | -9.86  | 2.27  | 6.47 | 4.   |       |        |       |       |       |       |

|     |                |       |      |      |      |      |      |      |      |       |        |      |       |   |   |    |      |        |        |        |       |      |      |       |       |       |       |       |       |
|-----|----------------|-------|------|------|------|------|------|------|------|-------|--------|------|-------|---|---|----|------|--------|--------|--------|-------|------|------|-------|-------|-------|-------|-------|-------|
| 164 | theophylline   | -4.70 | 0.31 | 0.52 | 0.63 | 0.94 | 1.34 | 2.16 | 2.33 | -0.66 | -0.71  | 1.80 | 6.93  | 1 | 6 | 7  | 3.47 | -9.10  | -5.77  | -8.53  | -0.2  | 3.02 | 1.50 | -1.31 | 0.12  | -0.94 | -2.78 | -0.54 | 0.72  |
| 165 | thioridazine   | 0.10  | 0.08 | 0.11 | 0.11 | 0.4  | 0.70 | 0.45 | 0.42 | 0.10  | 0.10   | 3.71 | 5.71  | 0 | 2 | 2  | 0.98 | -7.92  | -2.68  | -7.65  | 3.94  | 4.89 | 3.50 | 4.18  | 47.61 | 1.68  | -0.08 | 1.70  | 1.06  |
| 166 | timolol        | -0.70 | 0.20 | 0.31 | 0.34 | 0.97 | 1.22 | 3.20 | 9.70 | 0.26  | 0.80   | 3.16 | 7.97  | 2 | 7 | 9  | 3.06 | -9.17  | -11.24 | -8.05  | -1.39 | 4.95 | 2.88 | 1.21  |       |       |       |       |       |
| 167 | tinidazole     | -3.48 | 0.21 | 0.38 | 0.47 | 0.94 | 0.95 | 7.33 | 7.75 | 29.33 | 31.00  | 2.47 | 9.78  | 0 | 5 | 5  | 2.34 | -10.52 | -12.82 | -9.24  | -0.27 | 4.41 | 2.00 | 0.03  |       |       |       |       |       |
| 168 | tolterodine    | 0.15  | 0.08 | 0.14 | 0.13 | 0.45 | 1.83 | 0.08 | 0.45 | 0.02  | 0.13   | 3.25 | 2.35  | 1 | 2 | 3  | 2.18 | -8.95  | 2.20   | -9.17  | 2.94  | 5.73 | 3.44 | 3.24  | 0.21  | -0.68 | -2.05 | -0.66 | -1.19 |
| 169 | tramadol       | 1.75  |      | 0.24 |      | 0.63 | 1.96 | 1.55 | 3.20 |       |        | 2.63 | 3.27  | 1 | 3 | 4  |      |        |        | 0.00   | 0.36  |      |      |       |       |       |       |       |       |
| 170 | trazodone      | 0.48  | 0.15 | 0.20 | 0.23 | 0.76 | 1.75 | 0.78 | 0.80 | 0.26  | 0.26   | 3.72 | 4.24  | 0 | 6 | 6  | 3.41 | -8.50  | -6.21  | -7.88  | 1.58  | 5.01 | 3.36 | 2.8   | 9.30  | 0.97  | -0.66 | 1.00  | 0.52  |
| 171 | trimethoprim   | 1.45  | 0.20 | 0.29 | 0.32 | 0.84 | 0.79 | 1.34 | 1.89 | -0.24 | -0.34  | 2.90 | 10.55 | 2 | 7 | 9  | 2.09 | -8.80  | -1.22  | -8.68  | 0.58  | 4.14 | 2.63 | -2.47 |       |       |       |       |       |
| 172 | tropicamid     | 0.72  | 0.20 | 0.29 | 0.30 | 0.83 | 1.55 | 1.91 | 1.84 | -86   | -83.00 | 2.84 | 5.34  | 1 | 3 | 4  | 4.06 | -9.68  | -2.81  | -9.40  | 1.15  | 4.15 | 2.76 | -0.01 | 1.06  | 0.03  | -1.70 | 0.37  | 0.01  |
| 173 | valproic acid  | 0.25  | 0.01 | 0.03 | 0.01 | 0.04 | 0.11 | 0.79 | 0.05 | 0.26  | 0.02   | 1.44 | 3.73  | 1 | 2 | 3  | 1.93 | -11.19 | 10.01  | -12.19 | 0.16  | 3.75 | 5.54 | 2.61  | 0.08  | -1.09 | -2.66 | -1.02 | -1.51 |
| 174 | valsartan      | 19.40 | 0.18 | 0.23 | 0.25 | 0.97 | 0.86 | 0.95 | 1.01 | 0.23  | 0.25   | 4.22 | 11.21 | 2 | 8 | 10 | 2.92 | -9.69  | -6.39  | -9.05  | 0.05  | 5.46 | 3.92 | 3.88  | 0.08  | -1.10 | -3.15 | -1.08 | -1.68 |
| 175 | venlafaxine    | 0.57  | 0.14 | 0.22 | 0.21 | 0.61 | 1.99 | 1.37 | 2.41 | 0.26  | 0.45   | 2.77 | 3.27  | 1 | 3 | 4  | 3.25 | -9.02  | 2.73   | -9.29  | 1.07  | 4.44 | 2.85 | 1.44  | 8.25  | 0.92  | -0.60 | 1.49  | 0.76  |
| 176 | verapamil      | 0.37  | 0.11 | 0.19 | 0.19 | 0.86 | 1.34 | 0.58 | 0.96 | 0.92  | 1.51   | 4.55 | 6.40  | 0 | 6 | 6  | 5.44 | -8.76  | 0.90   | -8.85  | 2.33  | 7.51 | 4.53 | 0.57  | 11.97 | 1.08  | -0.73 | 1.12  | 1.32  |
| 177 | warfarin       | -0.97 | 0.22 | 0.28 | 0.32 | 0.87 | 1.31 | 1.00 | 0.84 | 2.15  | 1.80   | 3.08 | 6.36  | 1 | 3 | 4  | 4.12 | -7.38  | -13.35 | -6.05  | -0.9  | 4.01 | 2.76 | 0.46  |       |       |       |       |       |
| 178 | zolmitriptane  | -1.95 | 0.18 | 0.30 | 0.31 | 0.86 | 1.50 | 1.16 | 3.44 | -0.29 | -0.85  | 2.89 | 5.74  | 2 | 5 | 7  | 4.09 | -8.73  | -1.57  | -8.57  | -0.44 | 4.68 | 2.74 | -1.01 | 3.30  | 0.52  | -1.24 | 1.12  | -0.51 |
| 179 | zolpidem       | 0.25  | 0.23 | 0.25 | 0.26 | 0.76 | 2.05 | 0.96 | 0.84 | 1.02  | 0.90   | 3.07 | 3.76  | 0 | 4 | 4  | 6.69 | -8.37  | -0.45  | -8.33  | 3.02  | 3.33 | 2.94 | 0.86  | 2.60  | 0.42  | -1.16 | 0.45  | 0.48  |
| 180 | zopiclone      | -0.02 | 0.25 | 0.22 | 0.22 | 0.84 | 0.90 | 2.13 | 1.84 | 0.42  | 0.36   | 3.89 | 9.18  | 0 | 9 | 9  | 5.47 | -9.13  | -1.78  | -8.95  | -42   | 3.36 | 3.86 | 2.31  | 0.91  | -0.04 | -2.00 | 0.31  | -0.40 |
| 181 | zuclopenthixol | 0.12  | 0.11 | 0.16 | 0.17 | 0.62 | 1.15 | 0.48 | 0.61 | 0.09  | 0.12   | 3.97 | 5.20  | 1 | 3 | 4  | 2.45 | -7.57  | -4.53  | -7.12  | 5.06  | 5.58 | 3.55 | 4.97  | 48.73 | 1.69  | -0.03 | 1.69  | 0.99  |
